# Supplementary material for: Structures and hydrogen bonding of 1,7-dioxaspiro[5.5]undecane and its hydrates
Source: Royal Society of Chemistry journal article supplement (doi:10.1039/d1cp02964a), 2021-01-01
Supplement: d1cp02964a1.pdf [file d1cp02964a1.pdf]

## Electronic Supplementary Information

# Structures and Hydrogen Bonding of 1,7-dioxaspiro[5.5]undecane and its Hydrates

Yugao Xu,<sup>a</sup> Zhi-You Wei,<sup>b,c</sup> Wenqin Li,<sup>a</sup> Jiaqi Zhang,<sup>a</sup> Tao Lu,<sup>a</sup> Yan Jin,<sup>a</sup> Wei-Jun Zheng,<sup>b,c</sup> and Gang Feng<sup>\*a</sup>

<sup>a</sup> School of Chemistry and Chemical Engineering, Chongqing University, Daxuecheng South Rd. 55, 401331, Chongqing, China. E-mail: fengg@cqu.edu.cn

<sup>b</sup> Beijing National Laboratory for Molecular Sciences (BNLMS), State Key Laboratory of Molecular Reaction Dynamics, Institute of Chemistry, Chinese Academy of Sciences, Beijing 100190, China.

<sup>c</sup> University of Chinese Academy of Sciences, Beijing 100049, China.

### Table of Content:

**Table S1.** B3LYP-D3(BJ)/def2-TZVP calculated stable conformers of 1,7DSU and their spectroscopic parameters.

**Table S2.** B3LYP D3(BJ)/def2-TZVP calculated low energy isomers of the 1,7DSU $\cdots$ H<sub>2</sub>O cluster and their spectroscopic parameters.

**Figure S1.** The interconversion of isomer **m-1/1w-2** to isomer **m-1/1w-1** calculated at the B3LYP-D3(BJ)/def2-TZVP level of theory. The MP2/aug-cc-pVTZ calculated relative energies based on the B3LYP-D3(BJ)/def2-TZVP geometries are given in kJ mol<sup>-1</sup>.

**Table S3.** The experimental ( $r_s$  and  $r_0$ ) and theoretical coordinates of the 1,7DSU $\cdots$ H<sub>2</sub>O cluster.

**Table S4.** B3LYP-D3(BJ)/def2-TZVP calculated low energy isomers of the 1,7DSU $\cdots$ (H<sub>2</sub>O)<sub>2</sub> cluster and their spectroscopic parameters.

**Figure S2.** The interconversion of isomer **m-1/2w-2** to isomer **m-1/2w-1** explored using the synchronous transit-guided quasi-Newton (STQN) method and were further confirmed by transition state optimization at the B3LYP-D3(BJ)/def2-TZVP level of theory. The MP2/aug-cc-pVTZ calculated relative energies based on the B3LYP-D3(BJ)/def2-TZVP geometries are given in kJ mol<sup>-1</sup>.

**Table S5.** B3LYP-D3(BJ)/def2-TZVP calculated low energy isomers of the 1,7DSU $\cdots$ (H<sub>2</sub>O)<sub>3</sub> cluster and their spectroscopic parameters.

**Table S6.** B3LYP-D3(BJ)/def2-TZVP calculated low energy isomers of the 1,7DSU $\cdots$ (H<sub>2</sub>O)<sub>4</sub> cluster and their spectroscopic parameters.

**Table S7.** B3LYP-D3(BJ)/def2-TZVP calculated low energy isomers of the 1,7DSU $\cdots$ (H<sub>2</sub>O)<sub>5</sub> cluster and their spectroscopic parameters.

**Table S8.** The result of NBO analysis for the most stable isomer of the 1,7DSU $\cdots$ H<sub>2</sub>O cluster.

**Table S9.** The result of NBO analysis for the most stable isomer of the 1,7DSU $\cdots$ (H<sub>2</sub>O)<sub>2</sub> cluster.

**Table S10.** The result of NBO analysis for the most stable isomer of the 1,7DSU $\cdots$ (H<sub>2</sub>O)<sub>3</sub> cluster.

**Table S11.** The result of NBO analysis for the most stable isomer of the 1,7DSU $\cdots$ (H<sub>2</sub>O)<sub>4</sub> cluster.

**Table S12.** The result of NBO analysis for the most stable isomer of the 1,7DSU $\cdots$ (H<sub>2</sub>O)<sub>5</sub> cluster.

**Table S13.** Measured transition lines for the 1,7DSU.

**Table S14.** Measured transition lines for 1,7DSU $\cdots$ H<sub>2</sub>O.

**Table S15.** Measured transition Lines for 1,7DSU $\cdots$ H<sub>2</sub><sup>18</sup>O.

**Table S16.** Measured transition lines for 1,7DSU $\cdots$ D<sub>2</sub>O.

**Table S17.** Measured transition lines for 1,7DSU $\cdots$ HDO.

**Table S18.** Measured transition lines for 1,7DSU $\cdots$ DHO cluster.

**Table S19.** Measured transition lines for 1,7DSU $\cdots$ (H<sub>2</sub>O)<sub>2</sub>.

Table S1: B3LYP-D3(BJ)/def2-TZVP calculated stable conformers of 1,7DSU and their spectroscopic parameters.

| parameter                                   | m-1                                                                               | m-2                                                                                | m-3                                                                                 |
|---------------------------------------------|-----------------------------------------------------------------------------------|------------------------------------------------------------------------------------|-------------------------------------------------------------------------------------|
|                                             | 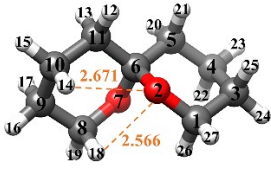 |  |  |
| $A, B, C$ [MHz]                             | 2224, 837, 806                                                                    | 2227, 821, 789                                                                     | 2190, 873, 800                                                                      |
| $\mu_a, \mu_b, \mu_c$ [D]                   | 0.0, -0.02, 0.0                                                                   | -0.5, -1.2, -1.2                                                                   | 0.0, -0.1, 0.06                                                                     |
| $\Delta E$ [cm <sup>-1</sup> ] <sup>a</sup> | 0                                                                                 | 1343                                                                               | 1741                                                                                |

<sup>a</sup> calculated at the MP2/aug-cc-PVTZ level on the top of the B3LYP-D3(BJ)/def2-TZVP geometry.

Table S2: B3LYP-D3(BJ)/def2-TZVP calculated low energy isomers of the 1,7DSU $\cdots$ H<sub>2</sub>O cluster and their spectroscopic parameters.

| parameter                                   | m-1/1w-1                                                                           | m-1/1w-2                                                                            | m-2/1w-3                                                                             |
|---------------------------------------------|------------------------------------------------------------------------------------|-------------------------------------------------------------------------------------|--------------------------------------------------------------------------------------|
|                                             | 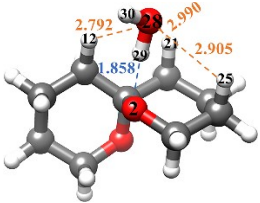 |  |  |
| $A, B, C$ [MHz]                             | 1265, 753, 612                                                                     | 1132, 795, 608                                                                      | 1213, 787, 622                                                                       |
| $\mu_a, \mu_b, \mu_c$ [D]                   | 1.6, 0.4, 1.1                                                                      | 1.7, -1.1, -1.0                                                                     | -1.0, -1.7, 3.7                                                                      |
| $\Delta E$ [cm <sup>-1</sup> ] <sup>a</sup> | 0                                                                                  | 109                                                                                 | 1156                                                                                 |

<sup>a</sup> calculated at the MP2/aug-cc-PVTZ level on the top of the B3LYP-D3(BJ)/def2-TZVP geometry.

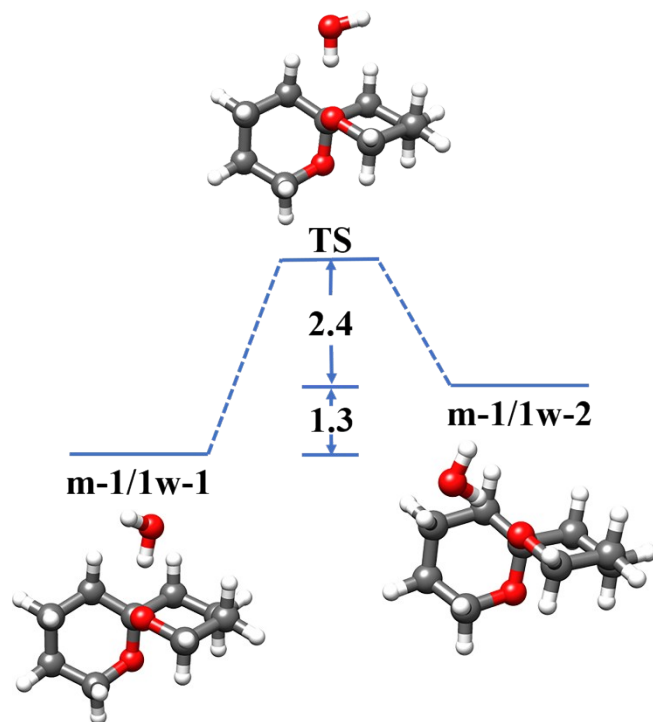

Figure S1. The interconversion of isomer **m-1/1w-2** to isomer **m-1/1w-1** calculated at the B3LYP-D3(BJ)/def2-TZVP level of theory. The MP2/aug-cc-pVTZ calculated relative energies based on the B3LYP-D3(BJ)/def2-TZVP geometries are given in  $\text{kJ mol}^{-1}$ .

Table S3. The experimental ( $r_s$  and  $r_0$ ) and theoretical coordinates of the 1,7DSU $\cdots$ H<sub>2</sub>O cluster.

|                                | $a$ (Å) |            |         | $b$ (Å) |            |         | $c$ (Å) |           |        |
|--------------------------------|---------|------------|---------|---------|------------|---------|---------|-----------|--------|
|                                | $r_e$   | $r_s$      | $r_0$   | $r_e$   | $r_s$      | $r_0$   | $r_e$   | $r_s$     | $r_0$  |
| H <sub>2</sub> <sup>18</sup> O | -1.965  | ±1.9853(8) | -1.9211 | -2.650  | ±2.7271(6) | -2.7588 | 0.108   | 0         | 0.088  |
| DOH                            | -1.376  | ±1.312(1)  | -1.3530 | -1.940  | ±1.9245(8) | -2.0253 | 0.419   | ±0.401(4) | 0.3858 |
| HOD                            | -1.703  | ±2.0394(7) | -1.6199 | -3.437  | ±3.2929(5) | -3.5341 | 0.594   | ±0.583(3) | 0.5705 |

Table S4: B3LYP-D3(BJ)/def2-TZVP calculated low energy isomers of the 1,7DSU $\cdots$ (H<sub>2</sub>O)<sub>2</sub> cluster and their spectroscopic parameters.

| parameter                                   | m-1/2w-1                                                                           | m-1/2w-2                                                                            | m-1/2w-3                                                                             |
|---------------------------------------------|------------------------------------------------------------------------------------|-------------------------------------------------------------------------------------|--------------------------------------------------------------------------------------|
|                                             | 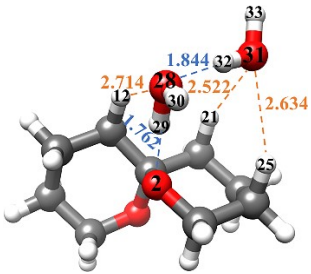  |   |   |
| $A, B, C$ [MHz]                             | 988, 583, 473                                                                      | 918, 600, 485                                                                       | 828, 658, 500                                                                        |
| $\mu_a, \mu_b, \mu_c$ [D]                   | -1.2, 0.7, 1.4                                                                     | 1.3, -0.1, 1.5                                                                      | -0.6, -0.1, 1.6                                                                      |
| $\Delta E$ [cm <sup>-1</sup> ] <sup>a</sup> | 0                                                                                  | 41                                                                                  | 195                                                                                  |
| parameter                                   | m-1/2w-4                                                                           | m-1/2w-5                                                                            | m-1/2w-6                                                                             |
|                                             |  |  |  |
| $A, B, C$ [MHz]                             | 1007, 528, 432                                                                     | 808, 598, 434                                                                       | 946, 595, 492                                                                        |
| $\mu_a, \mu_b, \mu_c$ [D]                   | -2.2, -0.3, 0.7                                                                    | 2.1, -0.1, -0.8                                                                     | 0, 0, -2.5                                                                           |
| $\Delta E$ [cm <sup>-1</sup> ]              | 227                                                                                | 319                                                                                 | 576                                                                                  |

<sup>a</sup> calculated at the MP2/aug-cc-PVTZ level on the top of the B3LYP-D3(BJ)/def2-TZVP geometry.

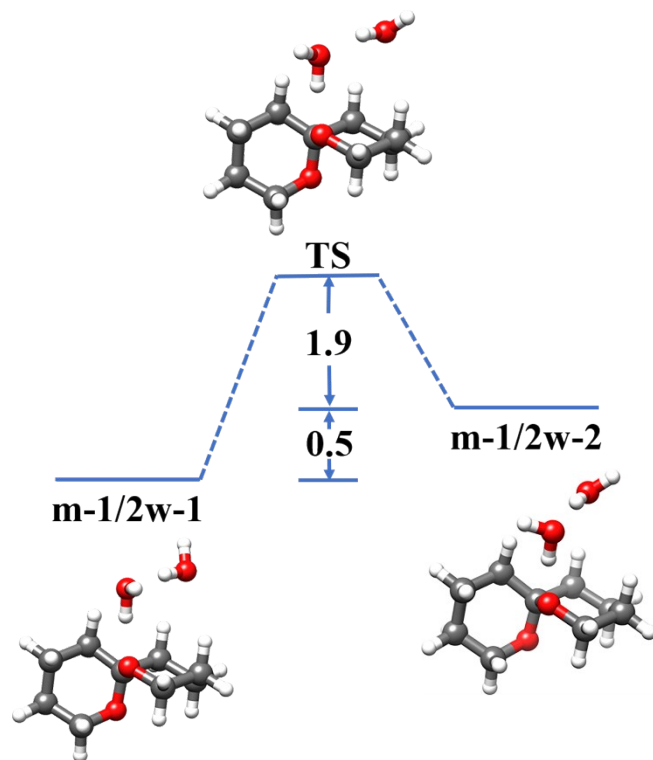

Figure S2. The interconversion of isomer **m-1/2w-2** to isomer **m-1/2w-1** explored using the synchronous transit-guided quasi-Newton (STQN) method and were further confirmed by transition state optimization at the B3LYP-D3(BJ)/def2-TZVP level of theory. The MP2/aug-cc-pVTZ calculated relative energies based on the B3LYP-D3(BJ)/def2-TZVP geometries are given in kJ mol<sup>-1</sup>.

Table S5: B3LYP-D3(BJ)/def2-TZVP calculated low energy isomers of the 1,7DSU $\cdots$ (H<sub>2</sub>O)<sub>3</sub> cluster and their spectroscopic parameters..

| parameter                                   | m-1/3w-1                                                                            | m-1/3w-2                                                                             | m-1/3w-3                                                                              |
|---------------------------------------------|-------------------------------------------------------------------------------------|--------------------------------------------------------------------------------------|---------------------------------------------------------------------------------------|
|                                             | 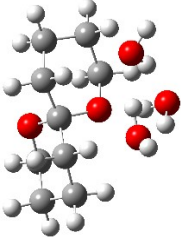   |    |    |
| $A, B, C$ [MHz]                             | 736, 490, 368                                                                       | 869, 429, 361                                                                        | 751, 479, 366                                                                         |
| $\mu_a, \mu_b, \mu_c$ [D]                   | 0.7, 0.2, -0.4                                                                      | 0.7, 0.3, -0.4                                                                       | 0.8, 0, 0.4                                                                           |
| $\Delta E$ [cm <sup>-1</sup> ] <sup>a</sup> | 0                                                                                   | 17                                                                                   | 17                                                                                    |
| parameter                                   | m-1/3w-4                                                                            | m-1/3w-5                                                                             | m-1/3w-6                                                                              |
|                                             |   |   |   |
| $A, B, C$ [MHz]                             | 810, 455, 372                                                                       | 882, 400, 349                                                                        | 705, 496, 364                                                                         |
| $\mu_a, \mu_b, \mu_c$ [D]                   | 0.8, 0.3, -0.6                                                                      | -0.8, 0, 0                                                                           | -1.4, 0.2, 1.1                                                                        |
| $\Delta E$ [cm <sup>-1</sup> ]              | 46                                                                                  | 77                                                                                   | 174                                                                                   |
| parameter                                   | m-1/3w-7                                                                            | m-1/3w-8                                                                             | m-1/3w-9                                                                              |
|                                             |  |  |  |
| $A, B, C$ [MHz]                             | 683, 512, 366                                                                       | 714, 461, 352                                                                        | 695, 527, 387                                                                         |
| $\mu_a, \mu_b, \mu_c$ [D]                   | -0.9, -0.1, 0.7                                                                     | 2.0, -0.9, -0.9                                                                      | -1.0, 1.7, -0.1                                                                       |
| $\Delta E$ [cm <sup>-1</sup> ]              | 183                                                                                 | 233                                                                                  | 234                                                                                   |
| parameter                                   | m-1/3w-10                                                                           | m-1/3w-11                                                                            | m-1/3w-12                                                                             |
|                                             |  |  |  |

|                                                                                      |                  |                  |                  |
|--------------------------------------------------------------------------------------|------------------|------------------|------------------|
| $A, B, C$ [MHz]                                                                      | 920, 393, 345    | 685, 496, 361    | 663, 568, 380    |
| $\mu_a, \mu_b, \mu_c$ [D]                                                            | -1.3, -1.4, 0    | 0.9, -0.2, -0.5  | -1.6, 1.6, -0.2  |
| $\Delta E$ [ $\text{cm}^{-1}$ ]                                                      | 239              | 299              | 309              |
| parameter                                                                            | <b>m-1/3w-13</b> | <b>m-1/3w-14</b> | <b>m-1/3w-15</b> |
| 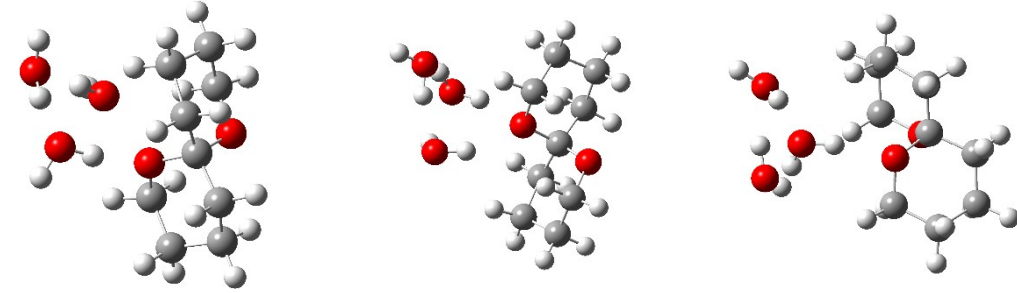   |                  |                  |                  |
| $A, B, C$ [MHz]                                                                      | 695, 496, 420    | 726, 503, 384    | 824, 447, 359    |
| $\mu_a, \mu_b, \mu_c$ [D]                                                            | 0.6, -0.6, 1.0   | -1.4, 0.9, -1.4  | -1.3, 1.0, 0.9   |
| $\Delta E$ [ $\text{cm}^{-1}$ ]                                                      | 321              | 342              | 356              |
| parameter                                                                            | <b>m-1/3w-16</b> | <b>m-1/3w-17</b> | <b>m-1/3w-18</b> |
|   |                  |                  |                  |
| $A, B, C$ [MHz]                                                                      | 795, 412, 343    | 721, 479, 368    | 776, 435, 355    |
| $\mu_a, \mu_b, \mu_c$ [D]                                                            | 1.7, -1.5, 0     | -1.0, 1.0, 1.3   | -1.6, -1.5, -0.6 |
| $\Delta E$ [ $\text{cm}^{-1}$ ]                                                      | 368              | 429              | 456              |
| parameter                                                                            | <b>m-1/3w-19</b> | <b>m-1/3w-20</b> | <b>m-1/3w-21</b> |
|  |                  |                  |                  |
| $A, B, C$ [MHz]                                                                      | 661, 523, 380    | 678, 459, 380    | 733, 454, 365    |
| $\mu_a, \mu_b, \mu_c$ [D]                                                            | 2.9, -2.2, 2.4   | 1.3, -1.2, 1.4   | -1.3, 0.9, 1.4   |
| $\Delta E$ [ $\text{cm}^{-1}$ ]                                                      | 491              | 502              | 576              |

<sup>a</sup> calculated at the MP2/aug-cc-pVTZ level on the top of the B3LYP-D3(BJ)/def2-TZVP geometry.



Table S6: B3LYP-D3(BJ)/def2-TZVP calculated low energy isomers of the 1,7DSU $\cdots$ (H<sub>2</sub>O)<sub>4</sub> cluster and their spectroscopic parameters..

| parameter                                   | m-1/4w-1                                                                            | m-1/4w-2                                                                             | m-1/4w-3                                                                              |
|---------------------------------------------|-------------------------------------------------------------------------------------|--------------------------------------------------------------------------------------|---------------------------------------------------------------------------------------|
|                                             | 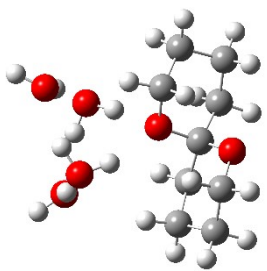   |    |    |
| $A, B, C$ [MHz]                             | 581, 456, 337                                                                       | 580, 451, 337                                                                        | 817, 305, 289                                                                         |
| $\mu_a, \mu_b, \mu_c$ [D]                   | 0.4, 0.0, -0.1                                                                      | 0.4, 0.0, -0.1                                                                       | 0.1, 0.6, 0                                                                           |
| $\Delta E$ [cm <sup>-1</sup> ] <sup>a</sup> | 0                                                                                   | 99                                                                                   | 217                                                                                   |
| parameter                                   | m-1/4w-4                                                                            | m-1/4w-5                                                                             | m-1/4w-6                                                                              |
|                                             |   |   |   |
| $A, B, C$ [MHz]                             | 588, 407, 307                                                                       | 635, 385, 303                                                                        | 809, 309, 290                                                                         |
| $\mu_a, \mu_b, \mu_c$ [D]                   | 0.3, 0.0, 0.5                                                                       | 0.2, 0.1, 0.5                                                                        | -0.1, 0.6, 0.3                                                                        |
| $\Delta E$ [cm <sup>-1</sup> ]              | 237                                                                                 | 240                                                                                  | 254                                                                                   |
| parameter                                   | m-1/4w-7                                                                            | m-1/4w-8                                                                             | m-1/4w-9                                                                              |
|                                             |  |  |  |
| $A, B, C$ [MHz]                             | 589, 403, 307                                                                       | 662, 368, 298                                                                        | 785, 316, 289                                                                         |
| $\mu_a, \mu_b, \mu_c$ [D]                   | -0.3, -0.2, 0.5                                                                     | 0.2, 0.2, -0.5                                                                       | -0.5, -0.3, -0.1                                                                      |
| $\Delta E$ [cm <sup>-1</sup> ]              | 279                                                                                 | 323                                                                                  | 346                                                                                   |
| parameter                                   | m-1/4w-10                                                                           | m-1/4w-11                                                                            | m-1/4w-12                                                                             |

|                                 |                                                                                     |                                                                                      |                                                                                       |
|---------------------------------|-------------------------------------------------------------------------------------|--------------------------------------------------------------------------------------|---------------------------------------------------------------------------------------|
|                                 | 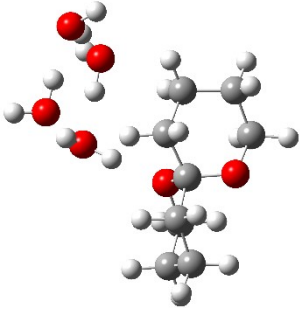   |    |    |
| $A, B, C$ [MHz]                 | 670, 336, 290                                                                       | 784, 315, 288                                                                        | 610, 400, 304                                                                         |
| $\mu_a, \mu_b, \mu_c$ [D]       | 0.6, 0.4, 0.2                                                                       | 0.6, -0.4, 0.1                                                                       | 0.1, -0.1, 0.6                                                                        |
| $\Delta E$ [ $\text{cm}^{-1}$ ] | 379                                                                                 | 388                                                                                  | 404                                                                                   |
| parameter                       | <b>m-1/4w-13</b>                                                                    | <b>m-1/4w-14</b>                                                                     | <b>m-1/4w-15</b>                                                                      |
|                                 |   |   |   |
| $A, B, C$ [MHz]                 | 589, 407, 309                                                                       | 652, 380, 299                                                                        | 762, 330, 299                                                                         |
| $\mu_a, \mu_b, \mu_c$ [D]       | 0.5, 0.1, 1.1                                                                       | -0.2, 0.0, -0.5                                                                      | -0.1, 0.8, -0.6                                                                       |
| $\Delta E$ [ $\text{cm}^{-1}$ ] | 435                                                                                 | 454                                                                                  | 589                                                                                   |
| parameter                       | <b>m-1/4w-16</b>                                                                    | <b>m-1/4w-17</b>                                                                     | <b>m-1/4w-18</b>                                                                      |
|                                 |  |  |  |
| $A, B, C$ [MHz]                 | 778, 321, 295                                                                       | 693, 331, 283                                                                        | 593, 392, 303                                                                         |
| $\mu_a, \mu_b, \mu_c$ [D]       | 0.4, -0.8, -0.1                                                                     | 0.3, 0.7, -1.2                                                                       | -2.3, -1.1, 1.6                                                                       |
| $\Delta E$ [ $\text{cm}^{-1}$ ] | 599                                                                                 | 651                                                                                  | 771                                                                                   |

<sup>a</sup> calculated at the MP2/aug-cc-PVTZ level on the top of the B3LYP-D3(BJ)/def2-TZVP geometry.

Table S7: B3LYP-D3(BJ)/def2-TZVP calculated low energy isomers of the 1,7DSU $\cdots$ (H<sub>2</sub>O)<sub>5</sub> cluster and their spectroscopic parameters..

| parameter                                   | m-1/5w-1                                                                            | m-1/5w-2                                                                             | m-1/5w-3                                                                              |
|---------------------------------------------|-------------------------------------------------------------------------------------|--------------------------------------------------------------------------------------|---------------------------------------------------------------------------------------|
|                                             | 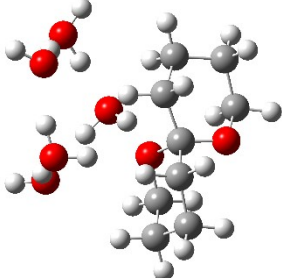   |    |    |
| $A, B, C$ [MHz]                             | 489, 369, 287                                                                       | 518, 345, 279                                                                        | 510, 351, 278                                                                         |
| $\mu_a, \mu_b, \mu_c$ [D]                   | 0.5, 1.4, 0.6                                                                       | 0.1, -1.4, -0.8                                                                      | -0.2, 1.7, -0.8                                                                       |
| $\Delta E$ [cm <sup>-1</sup> ] <sup>a</sup> | 0                                                                                   | 28                                                                                   | 33                                                                                    |
| parameter                                   | m-1/5w-4                                                                            | m-1/5w-5                                                                             | m-1/5w-6                                                                              |
|                                             |   |   |   |
| $A, B, C$ [MHz]                             | 491, 366, 287                                                                       | 486, 373, 288                                                                        | 488, 370, 287                                                                         |
| $\mu_a, \mu_b, \mu_c$ [D]                   | -0.8, -1.4, 1.0                                                                     | 0.9, -0.3, 0.7                                                                       | -0.8, 0.0, -0.8                                                                       |
| $\Delta E$ [cm <sup>-1</sup> ]              | 38                                                                                  | 43                                                                                   | 49                                                                                    |
| parameter                                   | m-1/5w-7                                                                            | m-1/5w-8                                                                             | m-1/5w-9                                                                              |
|                                             |  |  |  |
| $A, B, C$ [MHz]                             | 541, 327, 274                                                                       | 519, 343, 279                                                                        | 530, 342, 284                                                                         |
| $\mu_a, \mu_b, \mu_c$ [D]                   | -2.0, -1.4, -1.2                                                                    | 0.3, 1.4, 1.3                                                                        | -1.6, -1.7, -0.9                                                                      |
| $\Delta E$ [cm <sup>-1</sup> ]              | 53                                                                                  | 63                                                                                   | 90                                                                                    |
| parameter                                   | m-1/5w-10                                                                           | m-1/5w-11                                                                            | m-1/5w-12                                                                             |

|                                 |                                                                                     |                                                                                      |                                                                                       |
|---------------------------------|-------------------------------------------------------------------------------------|--------------------------------------------------------------------------------------|---------------------------------------------------------------------------------------|
|                                 | 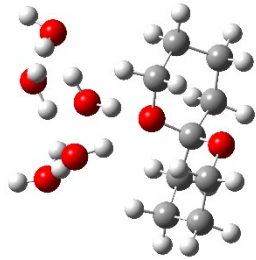   |    |    |
| $A, B, C$ [MHz]                 | 514, 348, 278                                                                       | 489, 364, 283                                                                        | 545, 337, 263                                                                         |
| $\mu_a, \mu_b, \mu_c$ [D]       | 0.0, -1.1, -1.0                                                                     | -0.6, 0.9, -0.7                                                                      | 1.6, 0.6, -1.9                                                                        |
| $\Delta E$ [ $\text{cm}^{-1}$ ] | 106                                                                                 | 141                                                                                  | 147                                                                                   |
| parameter                       | <b>m-1/5w-13</b>                                                                    | <b>m-1/5w-14</b>                                                                     | <b>m-1/5w-15</b>                                                                      |
|                                 |    |    |    |
| $A, B, C$ [MHz]                 | 498, 363, 285                                                                       | 547, 316, 269                                                                        | 536, 334, 281                                                                         |
| $\mu_a, \mu_b, \mu_c$ [D]       | 1.0, -0.6, 0.3                                                                      | -2.0, -1.6, -1.0                                                                     | -1.7, -1.7, -0.7                                                                      |
| $\Delta E$ [ $\text{cm}^{-1}$ ] | 162                                                                                 | 344                                                                                  | 355                                                                                   |
| parameter                       | <b>m-1/5w-16</b>                                                                    | <b>m-1/5w-17</b>                                                                     | <b>m-1/5w-18</b>                                                                      |
|                                 |  |  |  |
| $A, B, C$ [MHz]                 | 528, 342, 263                                                                       | 485, 349, 276                                                                        | 485, 347, 275                                                                         |
| $\mu_a, \mu_b, \mu_c$ [D]       | -1.7, -0.3, -2.1                                                                    | 1.1, 0.8, 1.1                                                                        | 0.9, -1.0, -0.8                                                                       |
| $\Delta E$ [ $\text{cm}^{-1}$ ] | 410                                                                                 | 502                                                                                  | 560                                                                                   |

<sup>a</sup> calculated at the MP2/aug-cc-PVTZ level on the top of the B3LYP-D3(BJ)/def2-TZVP geometry.

Table S8. The result of NBO analysis for the 1,7DSU···H<sub>2</sub>O cluster.

| 1W-1                                                                   |                           |                                   |                                                                        |                   |                                   |
|------------------------------------------------------------------------|---------------------------|-----------------------------------|------------------------------------------------------------------------|-------------------|-----------------------------------|
| From C <sub>9</sub> H <sub>16</sub> O <sub>2</sub> to H <sub>2</sub> O |                           |                                   | From H <sub>2</sub> O to C <sub>9</sub> H <sub>16</sub> O <sub>2</sub> |                   |                                   |
| Donor NBO <sup>a</sup>                                                 | Acceptor NBO <sup>b</sup> | <i>E</i> <sup>(2)</sup> /kcal/mol | Donor NBO                                                              | Acceptor NBO      | <i>E</i> <sup>(2)</sup> /kcal/mol |
| BD(1)C6-O7                                                             | BD*(1)O28-H29             | 0.08                              | BD(1)O28-H29                                                           | RY*(5)C6          | 0.07                              |
| BD(1)C6-O2                                                             | BD*(1)O28-H29             | 0.06                              | BD(1)O28-H29                                                           | RY*(2)O2          | 0.19                              |
| BD(1)C5-H21                                                            | BD*(1)O28-H30             | 0.05                              | BD(1)O28-H29                                                           | RY*(7)O2          | 0.07                              |
| BD(1)C3-H25                                                            | BD*(1)O28-H30             | 0.06                              | BD(1)O28-H29                                                           | BD*(1)C11-<br>H12 | 0.05                              |
| LP(1)O2                                                                | RY*(1)H29                 | 0.10                              | BD(1)O28-H29                                                           | BD*(1)C6-O7       | 0.12                              |
| LP(1)O2                                                                | BD*(1)O28-H29             | <b>2.12</b>                       | BD(1)O28-H29                                                           | BD*(1)C6-O2       | 0.11                              |
| LP(1)O2                                                                | RY*(1)O28                 | 0.08                              | BD(1)O28-H29                                                           | BD*(1)C1-O2       | 0.10                              |
| LP(1)O2                                                                | RY*(1)H29                 | 0.10                              | BD(1)O28-H30                                                           | RY*(1)H25         | 0.09                              |
| LP(1)O2                                                                | RY*(4)H29                 | 0.19                              | BD(1)O28-H30                                                           | RY*(2)H25         | 0.05                              |
| LP(1)O2                                                                | BD*(1)O28-H29             | <b>6.51</b>                       | BD(1)O28-H30                                                           | RY*(1)H21         | 0.12                              |
|                                                                        |                           |                                   | LP(1)O28                                                               | BD*(1)C3-H25      | 0.07                              |
|                                                                        |                           |                                   | LP(1)O28                                                               | BD*(1)C11-<br>H12 | 0.37                              |
|                                                                        |                           |                                   | LP(1)O28                                                               | BD*(1)C3-H25      | 0.09                              |

<sup>a</sup> BD for 2-center bond, LP for 1-center valence lone pair the unstarred and starred labels corresponding to Lewis and non-Lewis NBOs, respectively.

<sup>b</sup> RY\* for 1-center Rydberg, and BD\* for 2-center antibond, the unstarred and starred labels corresponding to Lewis and non-Lewis NBOs, respectively.

Table S9. The result of NBO analysis for the most stable isomer of the 1,7DSU⋯(H<sub>2</sub>O)<sub>2</sub> cluster.

| 2w-1                                                                                |                           |                                   |                                                                                     |               |                                   |
|-------------------------------------------------------------------------------------|---------------------------|-----------------------------------|-------------------------------------------------------------------------------------|---------------|-----------------------------------|
| From C <sub>9</sub> H <sub>16</sub> O <sub>2</sub> to H <sub>2</sub> O <sup>a</sup> |                           |                                   | From C <sub>9</sub> H <sub>16</sub> O <sub>2</sub> to H <sub>2</sub> O <sup>b</sup> |               |                                   |
| Donor NBO <sup>c</sup>                                                              | Acceptor NBO <sup>d</sup> | <i>E</i> <sup>(2)</sup> /kcal/mol | Donor NBO                                                                           | Acceptor NBO  | <i>E</i> <sup>(2)</sup> /kcal/mol |
| BD(1)O7-C6                                                                          | BD*(1)O28-H29             | 0.07                              | BD(1)C3-H25                                                                         | BD*(1)O31-H33 | 0.13                              |
| BD(1)C11-H12                                                                        | BD*(1)O28-H30             | 0.09                              |                                                                                     |               |                                   |
| LP(1)O2                                                                             | RY*(2)H29                 | 0.05                              |                                                                                     |               |                                   |
| LP(1)O2                                                                             | RY*(3)H29                 | 0.23                              |                                                                                     |               |                                   |
| LP(1)O2                                                                             | BD*(1)O28-H29             | <b>4.63</b>                       |                                                                                     |               |                                   |
| LP(2)O2                                                                             | RY*(1)O28                 | 0.08                              |                                                                                     |               |                                   |
| LP(2)O2                                                                             | RY*(1)H29                 | 0.05                              |                                                                                     |               |                                   |
| LP(2)O2                                                                             | RY*(2)H29                 | 0.10                              |                                                                                     |               |                                   |
| LP(2)O2                                                                             | RY*(4)H29                 | 0.07                              |                                                                                     |               |                                   |
| LP(2)O2                                                                             | RY*(7)H29                 | 0.09                              |                                                                                     |               |                                   |
| LP(2)O2                                                                             | BD*(1)O28-H29             | <b>8.88</b>                       |                                                                                     |               |                                   |
| From H <sub>2</sub> O <sup>a</sup> to C <sub>9</sub> H <sub>16</sub> O <sub>2</sub> |                           |                                   | From H <sub>2</sub> O <sup>a</sup> to H <sub>2</sub> O <sup>b</sup>                 |               |                                   |
| Donor NBO                                                                           | Acceptor NBO              | <i>E</i> <sup>(2)</sup> /kcal/mol | Donor NBO                                                                           | Acceptor NBO  | <i>E</i> <sup>(2)</sup> /kcal/mol |
| BD(1)O28-H30                                                                        | RY*(8)O2                  | 0.09                              | BD(1)O28-H30                                                                        | RY*(5)H32     | 0.13                              |
| BD(1)O28-H30                                                                        | RY*(1)H12                 | 0.36                              | BD(1)O28-H29                                                                        | BD*(1)O31-H32 | 0.12                              |
| BD(1)O28-H30                                                                        | RY*(3)H12                 | 0.07                              | LP(1)O28                                                                            | BD*(1)O31-H32 | 0.14                              |
| BD(1)O28-H29                                                                        | RY*(1)O2                  | 0.05                              | LP(2)O28                                                                            | RY*(4)H32     | 0.24                              |
| BD(1)O28-H29                                                                        | RY*(2)O2                  | 0.30                              | LP(2)O28                                                                            | BD*(1)O31-H32 | <b>11.26</b>                      |
| BD(1)O28-H29                                                                        | RY*(6)O2                  | 0.08                              |                                                                                     |               |                                   |
| BD(1)O28-H29                                                                        | BD*(1)O7-C6               | 0.05                              |                                                                                     |               |                                   |
| BD(1)O28-H29                                                                        | BD*(1)C6-O2               | 0.17                              |                                                                                     |               |                                   |
| BD(1)O28-H29                                                                        | BD*(1)C1-O2               | 0.15                              |                                                                                     |               |                                   |
| LP(1)O28                                                                            | BD*(1)C6-O2               | 0.06                              |                                                                                     |               |                                   |
| LP(1)O28                                                                            | BD*(1)C11-H12             | 0.14                              |                                                                                     |               |                                   |
| From H <sub>2</sub> O <sup>b</sup> to C <sub>9</sub> H <sub>16</sub> O <sub>2</sub> |                           |                                   | From H <sub>2</sub> O <sup>b</sup> to H <sub>2</sub> O <sup>a</sup>                 |               |                                   |
| Donor NBO                                                                           | Acceptor NBO              | <i>E</i> <sup>(2)</sup> /kcal/mol | Donor NBO                                                                           | Acceptor NBO  | <i>E</i> <sup>(2)</sup> /kcal/mol |
| BD(1)O31-H33                                                                        | RY*(4)H21                 | 0.14                              | BD(1)O31-H32                                                                        | BD*(1)O28-H30 | 0.13                              |
| BD(1)O31-H33                                                                        | RY*(1)H25                 | 0.53                              |                                                                                     |               |                                   |
| BD(1)O31-H32                                                                        | RY*(1)H21                 | 0.05                              |                                                                                     |               |                                   |
| BD(1)O31-H32                                                                        | RY*(2)H21                 | 0.16                              |                                                                                     |               |                                   |
| BD(1)O31-H32                                                                        | RY*(3)H21                 | 0.07                              |                                                                                     |               |                                   |
| LP(1)O31                                                                            | RY*(2)H25                 | 0.07                              |                                                                                     |               |                                   |
| LP(1)O31                                                                            | BD*(1)C5-H21              | 0.06                              |                                                                                     |               |                                   |
| LP(1)O31                                                                            | BD*(1)C3-H25              | 0.45                              |                                                                                     |               |                                   |
| LP(2)O31                                                                            | RY*(1)H21                 | 0.47                              |                                                                                     |               |                                   |
| LP(2)O31                                                                            | BD*(1)C5-H20              | 0.06                              |                                                                                     |               |                                   |
| LP(2)O31                                                                            | BD*(1)C5-H21              | <b>1.32</b>                       |                                                                                     |               |                                   |

<sup>a</sup> The oxygen atom number 28 of water. <sup>b</sup> The oxygen atom number 31 of water. <sup>c</sup> BD for 2-center bond, LP for 1-center valence lone pair the unstarred and starred labels corresponding to Lewis and non-Lewis NBOs, respectively. <sup>d</sup> RY\* for 1-center Rydberg, and BD\* for 2-center antibond, the unstarred and starred labels corresponding to Lewis and non-Lewis NBOs, respectively.

Table S10. The result of NBO analysis for the most stable isomer of the 1,7DSU $\cdots$ (H<sub>2</sub>O)<sub>3</sub> cluster.

| 3w-1                                                                                |                           |                                   |                                                                                     |               |                                   |
|-------------------------------------------------------------------------------------|---------------------------|-----------------------------------|-------------------------------------------------------------------------------------|---------------|-----------------------------------|
| From C <sub>9</sub> H <sub>16</sub> O <sub>2</sub> to H <sub>2</sub> O <sup>b</sup> |                           |                                   | From C <sub>9</sub> H <sub>16</sub> O <sub>2</sub> to H <sub>2</sub> O <sup>c</sup> |               |                                   |
| Donor NBO <sup>d</sup>                                                              | Acceptor NBO <sup>e</sup> | <i>E</i> <sup>(2)</sup> /kcal/mol | Donor NBO                                                                           | Acceptor NBO  | <i>E</i> <sup>(2)</sup> /kcal/mol |
| BD(1)C5-H21                                                                         | BD*(1)O31-H33             | 0.08                              | BD(1)C11-H12                                                                        | BD*(1)O34-H36 | 0.11                              |
| From C <sub>9</sub> H <sub>16</sub> O <sub>2</sub> to H <sub>2</sub> O <sup>a</sup> |                           |                                   | From H <sub>2</sub> O <sup>b</sup> to C <sub>9</sub> H <sub>16</sub> O <sub>2</sub> |               |                                   |
| Donor NBO                                                                           | Acceptor NBO              | <i>E</i> <sup>(2)</sup> /kcal/mol | Donor NBO                                                                           | Acceptor NBO  | <i>E</i> <sup>(2)</sup> /kcal/mol |
| BD(1)C6-O7                                                                          | BD*(1)O28-H29             | 0.07                              | BD(1)O31-H32                                                                        | RY*(1)H21     | 0.11                              |
| LP(1)O2                                                                             | RY*(1)H29                 | 0.06                              | BD(1)O31-H32                                                                        | RY*(3)H21     | 0.10                              |
| LP(1)O2                                                                             | RY*(3)H29                 | 0.12                              | BD(1)O31-H32                                                                        | BD*(1)C3-H25  | 0.06                              |
| LP(1)O2                                                                             | RY*(5)H29                 | 0.05                              | BD(1)O31-H33                                                                        | RY*(1)H21     | 0.27                              |
| LP(1)O2                                                                             | BD*(1)O28-H29             | <b>3.66</b>                       | BD(1)O31-H33                                                                        | RY*(2)H21     | 0.08                              |
| LP(2)O2                                                                             | RY*(1)O28                 | 0.08                              | LP(1)O31                                                                            | RY*(1)H21     | 0.47                              |
| LP(2)O2                                                                             | RY*(3)H29                 | 0.11                              | LP(1)O31                                                                            | RY*(2)H21     | 0.10                              |
| LP(2)O2                                                                             | RY*(5)H29                 | 0.19                              | LP(1)O31                                                                            | RY*(4)H21     | 0.06                              |
| LP(2)O2                                                                             | RY*(7)H29                 | 0.07                              | LP(1)O31                                                                            | BD*(1)C3-H25  | 0.06                              |
| LP(2)O2                                                                             | BD*(1)O28-H29             | <b>6.82</b>                       | LP(1)O31                                                                            | BD*(1)C5-H21  | 0.62                              |
|                                                                                     |                           |                                   | LP(2)O31                                                                            | BD*(1)C3-H25  | 0.11                              |
| From H <sub>2</sub> O <sup>b</sup> to H <sub>2</sub> O <sup>c</sup>                 |                           |                                   | From H <sub>2</sub> O <sup>b</sup> to H <sub>2</sub> O <sup>a</sup>                 |               |                                   |
| Donor NBO                                                                           | Acceptor NBO              | <i>E</i> <sup>(2)</sup> /kcal/mol | Donor NBO                                                                           | Acceptor NBO  | <i>E</i> <sup>(2)</sup> /kcal/mol |
| BD(1)O31-H32                                                                        | RY*(1)H35                 | 0.06                              | BD(1)O31-H33                                                                        | RY*(2)O28     | 0.07                              |
| BD(1)O31-H32                                                                        | RY*(5)H35                 | 0.12                              |                                                                                     |               |                                   |
| BD(1)O31-H32                                                                        | BD*(1)O34-H35             | 0.22                              |                                                                                     |               |                                   |
| BD(1)O31-H33                                                                        | RY*(5)H35                 | 0.09                              |                                                                                     |               |                                   |
| LP(1)O31                                                                            | RY*(2)H35                 | 0.06                              |                                                                                     |               |                                   |
| LP(1)O31                                                                            | BD*(1)O34-H35             | 0.17                              |                                                                                     |               |                                   |
| LP(2)O31                                                                            | RY*(4)H35                 | 0.19                              |                                                                                     |               |                                   |
| LP(2)O31                                                                            | RY*(6)H35                 | 0.07                              |                                                                                     |               |                                   |
| LP(2)O31                                                                            | BD*(1)O34-H35             | <b>8.58</b>                       |                                                                                     |               |                                   |
| From H <sub>2</sub> O <sup>c</sup> to C <sub>9</sub> H <sub>16</sub> O <sub>2</sub> |                           |                                   | From H <sub>2</sub> O <sup>c</sup> to H <sub>2</sub> O <sup>b</sup>                 |               |                                   |
| Donor NBO                                                                           | Acceptor NBO              | <i>E</i> <sup>(2)</sup> /kcal/mol | Donor NBO                                                                           | Acceptor NBO  | <i>E</i> <sup>(2)</sup> /kcal/mol |
| BD(1)O34-H36                                                                        | RY*(1)H12                 | 0.32                              | BD(1)O11-H35                                                                        | BD*(1)O31-H33 | 0.18                              |
| BD(1)O34-H36                                                                        | RY*(3)H12                 | 0.10                              |                                                                                     |               |                                   |
| BD(1)O34-H35                                                                        | RY*(1)H12                 | 0.08                              |                                                                                     |               |                                   |
| BD(1)O34-H35                                                                        | RY*(2)H12                 | 0.24                              |                                                                                     |               |                                   |
| LP(1)O34                                                                            | RY*(1)H12                 | 0.67                              |                                                                                     |               |                                   |
| LP(1)O34                                                                            | RY*(2)H12                 | 0.06                              |                                                                                     |               |                                   |
| LP(1)O34                                                                            | RY*(3)H12                 | 0.15                              |                                                                                     |               |                                   |
| LP(1)O34                                                                            | BD*(1)C11-H12             | 0.95                              |                                                                                     |               |                                   |
| LP(2)O34                                                                            | RY*(1)H12                 | 0.07                              |                                                                                     |               |                                   |
| LP(2)O34                                                                            | BD*(1)C11-H12             | 0.11                              |                                                                                     |               |                                   |
| From H <sub>2</sub> O <sup>c</sup> to H <sub>2</sub> O <sup>a</sup>                 |                           |                                   | From H <sub>2</sub> O <sup>a</sup> to C <sub>9</sub> H <sub>16</sub> O <sub>2</sub> |               |                                   |
| Donor NBO                                                                           | Acceptor NBO              | <i>E</i> <sup>(2)</sup> /kcal/mol | Donor NBO                                                                           | Acceptor NBO  | <i>E</i> <sup>(2)</sup> /kcal/mol |
| BD(1)O34-H36                                                                        | RY*(2)H30                 | 0.07                              | BD(1)O28-H29                                                                        | RY*(2)O2      | <b>0.22</b>                       |

| BD(1)O34-H36                                                        | BD*(1)O28-H30 | 0.08                              | BD(1)O28-H29                                                        | RY*(7)O2      | 0.06                              |
|---------------------------------------------------------------------|---------------|-----------------------------------|---------------------------------------------------------------------|---------------|-----------------------------------|
| BD(1)O34-H35                                                        | RY*(5)H30     | 0.10                              | BD(1)O28-H29                                                        | BD*(1)C1-O2   | 0.13                              |
| LP(2)O34                                                            | RY*(4)H30     | 0.13                              | BD(1)O28-H29                                                        | BD*(1)O2-C6   | 0.16                              |
| LP(2)O34                                                            | BD*(1)O28-H30 | <b>4.45</b>                       | LP(1)O28                                                            | BD*(1)C11-H12 | 0.05                              |
|                                                                     |               |                                   | LP(2)O28                                                            | RY*(2)O2      | 0.05                              |
| From H <sub>2</sub> O <sup>a</sup> to H <sub>2</sub> O <sup>b</sup> |               |                                   | From H <sub>2</sub> O <sup>a</sup> to H <sub>2</sub> O <sup>c</sup> |               |                                   |
| Donor NBO                                                           | Acceptor NBO  | <i>E</i> <sup>(2)</sup> /kcal/mol | Donor NBO                                                           | Acceptor NBO  | <i>E</i> <sup>(2)</sup> /kcal/mol |
| BD(1)O28-H30                                                        | RY*(1)H32     | 0.06                              | BD(1)O28-H30                                                        | BD*(1)O34-H36 | 0.22                              |
| BD(1)O28-H30                                                        | RY*(5)H32     | 0.10                              |                                                                     |               |                                   |
| BD(1)O28-H30                                                        | RY*(6)H32     | 0.09                              |                                                                     |               |                                   |
| BD(1)O28-H30                                                        | BD*(1)O31-H32 | 0.37                              |                                                                     |               |                                   |
| BD(1)O28-H29                                                        | RY*(5)H32     | 0.07                              |                                                                     |               |                                   |
| BD(1)O28-H29                                                        | BD*(1)O31-H32 | 0.11                              |                                                                     |               |                                   |
| CR(1)O28                                                            | BD*(1)O31-H32 | 0.05                              |                                                                     |               |                                   |
| LP(1)O28                                                            | RY*(1)H32     | 0.07                              |                                                                     |               |                                   |
| LP(1)O28                                                            | BD*(1)O31-H32 | 0.32                              |                                                                     |               |                                   |
| LP(2)O28                                                            | RY*(4)H32     | 0.21                              |                                                                     |               |                                   |
| LP(2)O28                                                            | BD*(1)O31-H32 | <b>17.32</b>                      |                                                                     |               |                                   |
| LP(2)O28                                                            | BD*(1)O31-H33 | 0.05                              |                                                                     |               |                                   |

<sup>a</sup> The oxygen atom number 28 of water.

<sup>b</sup> The oxygen atom number 31 of water.

<sup>c</sup> The oxygen atom number 34 of water.

<sup>d</sup> BD for 2-center bond, LP for 1-center valence lone pair the unstarred and starred labels corresponding to Lewis and non-Lewis NBOs, respectively.

<sup>e</sup> RY\* for 1-center Rydberg, and BD\* for 2-center antibond, the unstarred and starred labels corresponding to Lewis and non-Lewis NBOs, respectively.



Table S11. The result of NBO analysis for the most stable isomer of the 1,7DSU $\cdots$ (H<sub>2</sub>O)<sub>4</sub> cluster.

| 4w-1                                                                                |                           |                                   |                                                                                     |               |                                   |
|-------------------------------------------------------------------------------------|---------------------------|-----------------------------------|-------------------------------------------------------------------------------------|---------------|-----------------------------------|
| From C <sub>9</sub> H <sub>16</sub> O <sub>2</sub> to H <sub>2</sub> O <sup>b</sup> |                           |                                   | From C <sub>9</sub> H <sub>16</sub> O <sub>2</sub> to H <sub>2</sub> O <sup>c</sup> |               |                                   |
| Donor NBO <sup>e</sup>                                                              | Acceptor NBO <sup>f</sup> | <i>E</i> <sup>(2)</sup> /kcal/mol | Donor NBO                                                                           | Acceptor NBO  | <i>E</i> <sup>(2)</sup> /kcal/mol |
| BD(1)C1-H27                                                                         | BD*(1)O31-H32             | 0.10                              | BD(1)O7-C6                                                                          | BD*(1)O34-H35 | 0.09                              |
|                                                                                     |                           |                                   | BD(1)C6-O2                                                                          | BD*(1)O34-H35 | 0.07                              |
|                                                                                     |                           |                                   | LP(1)O2                                                                             | BD*(1)O34-H35 | <b>1.64</b>                       |
|                                                                                     |                           |                                   | LP(2)O2                                                                             | RY*(5)H35     | 0.10                              |
|                                                                                     |                           |                                   | LP(2)O2                                                                             | RY*(7)H35     | 0.06                              |
|                                                                                     |                           |                                   | LP(2)O2                                                                             | BD*(1)O34-H35 | <b>4.32</b>                       |
| From C <sub>9</sub> H <sub>16</sub> O <sub>2</sub> to H <sub>2</sub> O <sup>a</sup> |                           |                                   | From H <sub>2</sub> O <sup>b</sup> to C <sub>9</sub> H <sub>16</sub> O <sub>2</sub> |               |                                   |
| Donor NBO                                                                           | Acceptor NBO              | <i>E</i> <sup>(2)</sup> /kcal/mol | Donor NBO                                                                           | Acceptor NBO  | <i>E</i> <sup>(2)</sup> /kcal/mol |
| BD(1)C6-C5                                                                          | BD*(1)O28-H29             | 0.10                              | BD(1)O31-H32                                                                        | RY*(2)C1      | 0.05                              |
| BD(1)C10-H14                                                                        | BD*(1)O28-H30             | 0.10                              | BD(1)O31-H32                                                                        | RY*(1)H27     | 0.17                              |
| BD(1)C10-H14                                                                        | BD*(1)O28-H29             | 0.08                              | BD(1)O31-H32                                                                        | RY*(3)H27     | 0.06                              |
| LP(1)O2                                                                             | RY*(4)H29                 | 0.08                              | BD(1)O31-H33                                                                        | RY*(4)H27     | 0.11                              |
| LP(1)O2                                                                             | BD*(1)O28-H29             | <b>4.20</b>                       | BD(1)O31-H33                                                                        | RY*(2)O2      | 0.07                              |
| LP(2)O2                                                                             | BD*(1)O28-H29             | 0.71                              | LP(1)O31                                                                            | RY*(1)H27     | 0.18                              |
|                                                                                     |                           |                                   | LP(1)O31                                                                            | BD*(1)C1-H27  | 0.63                              |
| From H <sub>2</sub> O <sup>b</sup> to H <sub>2</sub> O <sup>c</sup>                 |                           |                                   | From H <sub>2</sub> O <sup>b</sup> to H <sub>2</sub> O <sup>a</sup>                 |               |                                   |
| Donor NBO                                                                           | Acceptor NBO              | <i>E</i> <sup>(2)</sup> /kcal/mol | Donor NBO                                                                           | Acceptor NBO  | <i>E</i> <sup>(2)</sup> /kcal/mol |
| BD(1)O31-H32                                                                        | RY*(2)O34                 | 0.07                              | BD(1)O31-H32                                                                        | RY*(1)H30     | 0.07                              |
| BD(1)O31-H33                                                                        | RY*(5)H35                 | 0.05                              | BD(1)O31-H32                                                                        | RY*(5)H30     | 0.06                              |
|                                                                                     |                           |                                   | BD(1)O31-H33                                                                        | RY*(5)H30     | 0.09                              |
|                                                                                     |                           |                                   | BD(1)O31-H33                                                                        | BD*(1)O28-H30 | 0.13                              |
|                                                                                     |                           |                                   | LP(1)O31                                                                            | RY*(1)H30     | 0.05                              |
|                                                                                     |                           |                                   | LP(1)O31                                                                            | BD*(1)O28-H30 | 0.11                              |
|                                                                                     |                           |                                   | LP(2)O31                                                                            | RY*(1)O28     | 0.10                              |
|                                                                                     |                           |                                   | LP(2)O31                                                                            | RY*(4)H30     | 0.22                              |
|                                                                                     |                           |                                   | LP(2)O31                                                                            | RY*(5)H30     | 0.05                              |
|                                                                                     |                           |                                   | LP(2)O31                                                                            | BD*(1)O28-H30 | <b>9.41</b>                       |
| From H <sub>2</sub> O <sup>c</sup> to C <sub>9</sub> H <sub>16</sub> O <sub>2</sub> |                           |                                   | From H <sub>2</sub> O <sup>c</sup> to H <sub>2</sub> O <sup>b</sup>                 |               |                                   |
| Donor NBO                                                                           | Acceptor NBO              | <i>E</i> <sup>(2)</sup> /kcal/mol | Donor NBO                                                                           | Acceptor NBO  | <i>E</i> <sup>(2)</sup> /kcal/mol |
| BD(1)O34-H35                                                                        | RY*(2)O2                  | 0.50                              | BD(1)O34-H36                                                                        | RY*(5)H33     | 0.10                              |
| BD(1)O34-H35                                                                        | BD*(1)O7-C6               | 0.06                              | BD(1)O34-H36                                                                        | BD*(1)O31-H33 | 0.12                              |
| BD(1)O34-H35                                                                        | BD*(1)C6-O2               | 0.08                              | BD(1)O34-H35                                                                        | RY*(5)H33     | 0.06                              |
| BD(1)O34-H35                                                                        | BD*(1)C1-O2               | 0.07                              | BD(1)O34-H35                                                                        | BD*(1)O31-H33 | 0.26                              |
| LP(1)O34                                                                            | BD*(1)C6-O2               | 0.06                              | LP(1)O34                                                                            | RY*(1)H33     | 0.14                              |
| LP(2)O34                                                                            | RY*(1)H12                 | 0.06                              | LP(1)O34                                                                            | BD*(1)O31-H33 | 0.31                              |
| LP(2)O34                                                                            | BD*(1)C11-H12             | 0.09                              | LP(2)O34                                                                            | RY*(1)O31     | 0.07                              |
|                                                                                     |                           |                                   | LP(2)O34                                                                            | RY*(4)H33     | 0.20                              |
|                                                                                     |                           |                                   | LP(2)O34                                                                            | RY*(6)H33     | 0.10                              |
|                                                                                     |                           |                                   | LP(2)O34                                                                            | BD*(1)O31-H32 | 0.06                              |
|                                                                                     |                           |                                   | LP(2)O34                                                                            | BD*(1)O31-H33 | <b>17.14</b>                      |

| From H <sub>2</sub> O <sup>c</sup> to H <sub>2</sub> O <sup>d</sup>                 |               |                                   | From H <sub>2</sub> O <sup>a</sup> to C <sub>9</sub> H <sub>16</sub> O <sub>2</sub> |               |                                   |
|-------------------------------------------------------------------------------------|---------------|-----------------------------------|-------------------------------------------------------------------------------------|---------------|-----------------------------------|
| Donor NBO                                                                           | Acceptor NBO  | <i>E</i> <sup>(2)</sup> /kcal/mol | Donor NBO                                                                           | Acceptor NBO  | <i>E</i> <sup>(2)</sup> /kcal/mol |
| BD(1)O34-H36                                                                        | BD*(1)O37-H38 | 0.24                              | BD(1)O28-H30                                                                        | RY*(1)H14     | 0.32                              |
|                                                                                     |               |                                   | BD(1)O28-H29                                                                        | RY*(1)O2      | 0.24                              |
|                                                                                     |               |                                   | BD(1)O28-H29                                                                        | RY*(2)O2      | 0.24                              |
|                                                                                     |               |                                   | BD(1)O28-H29                                                                        | RY*(13)O2     | 0.06                              |
|                                                                                     |               |                                   | BD(1)O28-H29                                                                        | RY*(1)H14     | 0.20                              |
|                                                                                     |               |                                   | BD(1)O28-H29                                                                        | BD*(1)C6-O2   | 0.14                              |
|                                                                                     |               |                                   | BD(1)O28-H29                                                                        | BD*(1)C6-O2   | 0.07                              |
|                                                                                     |               |                                   | BD(1)O28-H29                                                                        | BD*(1)C10-H14 | 0.18                              |
|                                                                                     |               |                                   | LP(1)O28                                                                            | RY*(3)O2      | 0.06                              |
|                                                                                     |               |                                   | LP(1)O28                                                                            | BD*(1)C6-O2   | 0.12                              |
|                                                                                     |               |                                   | LP(1)O28                                                                            | BD*(1)C10-H14 | 0.10                              |
|                                                                                     |               |                                   | LP(2)O28                                                                            | BD*(1)C10-H14 | 0.13                              |
| From H <sub>2</sub> O <sup>a</sup> to H <sub>2</sub> O <sup>b</sup>                 |               |                                   | From H <sub>2</sub> O <sup>a</sup> to H <sub>2</sub> O <sup>d</sup>                 |               |                                   |
| Donor NBO                                                                           | Acceptor NBO  | <i>E</i> <sup>(2)</sup> /kcal/mol | Donor NBO                                                                           | Acceptor NBO  | <i>E</i> <sup>(2)</sup> /kcal/mol |
| BD(1)O28-H30                                                                        | BD*(1)O31-H32 | 0.24                              | BD(1)O28-H30                                                                        | RY*(5)H39     | 0.08                              |
|                                                                                     |               |                                   | BD(1)O28-H30                                                                        | BD*(1)O37-H39 | 0.14                              |
|                                                                                     |               |                                   | BD(1)O28-H29                                                                        | RY*(5)H39     | 0.07                              |
|                                                                                     |               |                                   | BD(1)O28-H29                                                                        | BD*(1)O37-H39 | 0.18                              |
|                                                                                     |               |                                   | LP(1)O28                                                                            | RY*(1)H39     | 0.15                              |
|                                                                                     |               |                                   | LP(1)O28                                                                            | BD*(1)O37-H39 | 0.26                              |
|                                                                                     |               |                                   | LP(2)O28                                                                            | RY*(1)O37     | 0.05                              |
|                                                                                     |               |                                   | LP(2)O28                                                                            | RY*(4)H39     | 0.19                              |
|                                                                                     |               |                                   | LP(2)O28                                                                            | RY*(6)H39     | 0.10                              |
|                                                                                     |               |                                   | LP(2)O28                                                                            | BD*(1)O37-H39 | <b>16.82</b>                      |
|                                                                                     |               |                                   | LP(2)O28                                                                            | BD*(1)O37-H38 | 0.05                              |
| From H <sub>2</sub> O <sup>d</sup> to C <sub>9</sub> H <sub>16</sub> O <sub>2</sub> |               |                                   | From H <sub>2</sub> O <sup>d</sup> to H <sub>2</sub> O <sup>c</sup>                 |               |                                   |
| Donor NBO                                                                           | Acceptor NBO  | <i>E</i> <sup>(2)</sup> /kcal/mol | Donor NBO                                                                           | Acceptor NBO  | <i>E</i> <sup>(2)</sup> /kcal/mol |
| BD(1)O37-H39                                                                        | RY*(2)O2      | 0.09                              | BD(1)O37-H39                                                                        | RY*(5)H36     | 0.09                              |
| BD(1)O37-H39                                                                        | RY*(2)H14     | 0.09                              | BD(1)O37-H39                                                                        | BD*(1)O34-H36 | 0.17                              |
| BD(1)O37-H38                                                                        | RY*(1)H12     | 0.11                              | BD(1)O37-H38                                                                        | RY*(1)H36     | 0.08                              |
| LP(1)O37                                                                            | RY*(2)H12     | 0.11                              | BD(1)O37-H38                                                                        | RY*(5)H36     | 0.06                              |
| LP(1)O37                                                                            | BD*(1)C11-H12 | 0.14                              | LP(1)O37                                                                            | RY*(1)H36     | 0.07                              |
|                                                                                     |               |                                   | LP(1)O37                                                                            | BD*(1)O34-H36 | 0.14                              |
|                                                                                     |               |                                   | LP(2)O37                                                                            | RY*(1)O34     | 0.12                              |
|                                                                                     |               |                                   | LP(2)O37                                                                            | RY*(4)H36     | 0.23                              |
|                                                                                     |               |                                   | LP(2)O37                                                                            | BD*(1)O34-H36 | <b>10.12</b>                      |

<sup>a</sup> The oxygen atom number 28 of water. <sup>b</sup> The oxygen atom number 31 of water. <sup>c</sup> The oxygen atom number 34 of water. <sup>d</sup> The oxygen atom number 37 of water. <sup>e</sup> BD for 2-center bond, LP for 1-center valence lone pair the unstarred and starred labels corresponding to Lewis and non-Lewis NBOs, respectively. <sup>f</sup> RY\* for 1-center Rydberg, and BD\* for 2-center antibond, the unstarred and starred labels corresponding to Lewis and non-Lewis NBOs, respectively.

Table S12. The result of NBO analysis for the most stable isomer of the 1,7DSU... $(\text{H}_2\text{O})_5$  cluster.

| 5w-1                                                               |                           |                           |                                                                    |               |                           |
|--------------------------------------------------------------------|---------------------------|---------------------------|--------------------------------------------------------------------|---------------|---------------------------|
| From $\text{C}_9\text{H}_{16}\text{O}_2$ to $\text{H}_2\text{O}^c$ |                           |                           | From $\text{C}_9\text{H}_{16}\text{O}_2$ to $\text{H}_2\text{O}^b$ |               |                           |
| Donor NBO <sup>f</sup>                                             | Acceptor NBO <sup>g</sup> | $E^{(2)}/\text{kcal/mol}$ | Donor NBO                                                          | Acceptor NBO  | $E^{(2)}/\text{kcal/mol}$ |
| BD(1)O2-C6                                                         | BD*(1)O34-H35             | 0.06                      | BD(1)C1-H27                                                        | BD*(1)O31-H32 | 0.09                      |
| BD(1)C6-O7                                                         | BD*(1)O34-H35             | 0.09                      |                                                                    |               |                           |
| LP(1)O2                                                            | RY*(1)H35                 | 0.13                      |                                                                    |               |                           |
| LP(1)O2                                                            | BD*(1)O34-H35             | <b>2.24</b>               |                                                                    |               |                           |
| LP(2)O2                                                            | RY*(5)H35                 | 0.11                      |                                                                    |               |                           |
| LP(2)O2                                                            | RY*(7)H35                 | 0.08                      |                                                                    |               |                           |
| LP(2)O2                                                            | BD*(1)O34-H35             | <b>4.92</b>               |                                                                    |               |                           |
| From $\text{C}_9\text{H}_{16}\text{O}_2$ to $\text{H}_2\text{O}^a$ |                           |                           | From $\text{C}_9\text{H}_{16}\text{O}_2$ to $\text{H}_2\text{O}^d$ |               |                           |
| Donor NBO                                                          | Acceptor NBO              | $E^{(2)}/\text{kcal/mol}$ | Donor NBO                                                          | Acceptor NBO  | $E^{(2)}/\text{kcal/mol}$ |
| BD(1)C6-C5                                                         | BD*(1)O28-H29             | 0.10                      | BD(1)C11-H12                                                       | BD*(1)O37-H38 | 0.06                      |
| BD(1)C10-H14                                                       | BD*(1)O28-H30             | 0.05                      |                                                                    |               |                           |
| BD(1)C10-H14                                                       | BD*(1)O28-H29             | 0.08                      |                                                                    |               |                           |
| LP(1)O2                                                            | RY*(4)H29                 | 0.06                      |                                                                    |               |                           |
| LP(1)O2                                                            | BD*(1)O28-H29             | <b>4.38</b>               |                                                                    |               |                           |
| LP(2)O2                                                            | RY*(4)H29                 | 0.05                      |                                                                    |               |                           |
| LP(2)O2                                                            | BD*(1)O28-H29             | 0.85                      |                                                                    |               |                           |
| From $\text{H}_2\text{O}^c$ to $\text{C}_9\text{H}_{16}\text{O}_2$ |                           |                           | From $\text{H}_2\text{O}^c$ to $\text{H}_2\text{O}^b$              |               |                           |
| Donor NBO                                                          | Acceptor NBO              | $E^{(2)}/\text{kcal/mol}$ | Donor NBO                                                          | Acceptor NBO  | $E^{(2)}/\text{kcal/mol}$ |
| BD(1)O34-H35                                                       | RY*(1)O2                  | 0.30                      | BD(1)O34-H36                                                       | RY*(5)H33     | 0.10                      |
| BD(1)O34-H35                                                       | RY*(2)O2                  | 0.22                      | BD(1)O34-H35                                                       | RY*(5)H33     | 0.06                      |
| BD(1)O34-H35                                                       | BD*(1)C1-O2               | 0.09                      | BD(1)O34-H35                                                       | BD*(1)O31-H33 | 0.33                      |
| BD(1)O34-H35                                                       | BD*(1)O2-C6               | 0.10                      | CR(1)O34                                                           | BD*(1)O31-H33 | 0.07                      |
| BD(1)O34-H35                                                       | BD*(1)C6-O7               | 0.06                      | LP(1)O34                                                           | RY*(1)H33     | 0.14                      |
| LP(1)O34                                                           | BD*(1)C3-H25              | 0.06                      | LP(1)O34                                                           | BD*(1)O31-H33 | 0.36                      |
| LP(1)O34                                                           | BD*(1)O2-C6               | 0.05                      | LP(2)O34                                                           | RY*(1)O31     | 0.06                      |
| LP(2)O34                                                           | BD*(1)C11-H12             | 0.07                      | LP(2)O34                                                           | RY*(4)H33     | 0.28                      |
|                                                                    |                           |                           | LP(2)O34                                                           | RY*(6)H33     | 0.08                      |
|                                                                    |                           |                           | LP(2)O34                                                           | BD*(1)O31-H32 | 0.05                      |
|                                                                    |                           |                           | LP(2)O34                                                           | BD*(1)O31-H33 | <b>18.83</b>              |
| From $\text{H}_2\text{O}^c$ to $\text{H}_2\text{O}^d$              |                           |                           | From $\text{H}_2\text{O}^b$ to $\text{C}_9\text{H}_{16}\text{O}_2$ |               |                           |
| Donor NBO                                                          | Donor NBO                 | Donor NBO                 | Donor NBO                                                          | Acceptor NBO  | $E^{(2)}/\text{kcal/mol}$ |
| BD(1)O34-H36                                                       | BD*(1)O37-H38             | 0.10                      | BD(1)O31-H32                                                       | RY*(2)C1      | 0.06                      |
|                                                                    |                           |                           | BD(1)O31-H32                                                       | RY*(1)H27     | 0.23                      |
|                                                                    |                           |                           | LP(1)O31                                                           | BD*(1)C1-H27  | 0.35                      |
| From $\text{H}_2\text{O}^b$ to $\text{H}_2\text{O}^c$              |                           |                           | From $\text{H}_2\text{O}^b$ to $\text{H}_2\text{O}^a$              |               |                           |
| Donor NBO                                                          | Acceptor NBO              | $E^{(2)}/\text{kcal/mol}$ | Donor NBO                                                          | Acceptor NBO  | $E^{(2)}/\text{kcal/mol}$ |
| BD(1)O31-H32                                                       | RY*(2)O34                 | 0.08                      | BD(1)O31-H32                                                       | RY*(5)H30     | 0.07                      |
| BD(1)O31-H33                                                       | RY*(3)H35                 | 0.06                      | BD(1)O31-H33                                                       | RY*(5)H30     | 0.11                      |
| BD(1)O31-H33                                                       | BD*(1)O34-H36             | 0.06                      | BD(1)O31-H33                                                       | BD*(1)O28-H30 | 0.22                      |
|                                                                    |                           |                           | LP(1)O31                                                           | RY*(1)H30     | 0.07                      |

|                                                                                    |               |                                   |                                                                                    |               |                                   |
|------------------------------------------------------------------------------------|---------------|-----------------------------------|------------------------------------------------------------------------------------|---------------|-----------------------------------|
|                                                                                    |               |                                   | LP(1)O31                                                                           | BD*(1)O28-H30 | 0.15                              |
|                                                                                    |               |                                   | LP(2)O31                                                                           | RY*(3)O28     | 0.10                              |
|                                                                                    |               |                                   | LP(2)O31                                                                           | RY*(4)H30     | 0.24                              |
|                                                                                    |               |                                   | LP(2)O31                                                                           | RY*(5)H30     | 0.08                              |
|                                                                                    |               |                                   | LP(2)O31                                                                           | BD*(1)O28-H30 | <b>13.08</b>                      |
| <b>From H<sub>2</sub>O<sup>a</sup> to C<sub>9</sub>H<sub>16</sub>O<sub>2</sub></b> |               |                                   | <b>From H<sub>2</sub>O<sup>a</sup> to H<sub>2</sub>O<sup>b</sup></b>               |               |                                   |
| Donor NBO                                                                          | Acceptor NBO  | <i>E</i> <sup>(2)</sup> /kcal/mol | Donor NBO                                                                          | Acceptor NBO  | <i>E</i> <sup>(2)</sup> /kcal/mol |
| BD(1)O28-H30                                                                       | RY*(2)O2      | 0.07                              | BD(1)O28-H30                                                                       | BD*(1)O31-H32 | 0.19                              |
| BD(1)O28-H30                                                                       | RY*(1)H14     | 0.07                              |                                                                                    |               |                                   |
| BD(1)O28-H30                                                                       | RY*(2)H14     | 0.07                              |                                                                                    |               |                                   |
| BD(1)O28-H29                                                                       | RY*(2)O2      | 0.43                              |                                                                                    |               |                                   |
| BD(1)O28-H29                                                                       | RY*(6)O2      | 0.12                              |                                                                                    |               |                                   |
| BD(1)O28-H29                                                                       | RY*(1)H14     | 0.07                              |                                                                                    |               |                                   |
| BD(1)O28-H29                                                                       | RY*(2)H14     | 0.06                              |                                                                                    |               |                                   |
| BD(1)O28-H29                                                                       | RY*(3)H14     | 0.05                              |                                                                                    |               |                                   |
| BD(1)O28-H29                                                                       | BD*(1)C1-O2   | 0.08                              |                                                                                    |               |                                   |
| BD(1)O28-H29                                                                       | BD*(1)O2-C6   | 0.14                              |                                                                                    |               |                                   |
| BD(1)O28-H29                                                                       | BD*(1)C10-H14 | 0.18                              |                                                                                    |               |                                   |
| LP(1)O28                                                                           | RY*(2)O2      | 0.13                              |                                                                                    |               |                                   |
| LP(1)O28                                                                           | BD*(1)O2-C6   | 0.09                              |                                                                                    |               |                                   |
| LP(2)O28                                                                           | BD*(1)C3-C1   | 0.06                              |                                                                                    |               |                                   |
| LP(2)O28                                                                           | BD*(1)O2-C6   | 0.07                              |                                                                                    |               |                                   |
| LP(2)O28                                                                           | BD*(1)C10-H14 | 0.16                              |                                                                                    |               |                                   |
| <b>From H<sub>2</sub>O<sup>c</sup> to H<sub>2</sub>O<sup>e</sup></b>               |               |                                   | <b>From H<sub>2</sub>O<sup>e</sup> to C<sub>9</sub>H<sub>16</sub>O<sub>2</sub></b> |               |                                   |
| Donor NBO                                                                          | Acceptor NBO  | <i>E</i> <sup>(2)</sup> /kcal/mol | Donor NBO                                                                          | Acceptor NBO  | <i>E</i> <sup>(2)</sup> /kcal/mol |
| BD(1)O28-H30                                                                       | RY*(5)H42     | 0.12                              | BD(1)O40-H42                                                                       | RY*(1)H14     | 0.23                              |
| BD(1)O28-H30                                                                       | BD*(1)O40-H42 | 0.27                              | BD(1)O40-H42                                                                       | BD*(1)C10-H14 | 0.08                              |
| BD(1)O28-H29                                                                       | BD*(1)O10-H42 | 0.13                              | BD(1)O40-H41                                                                       | RY*(1)H14     | 0.15                              |
| CR(1)O28                                                                           | BD*(1)O40-H42 | 0.12                              | BD(1)O40-H41                                                                       | RY*(2)H14     | 0.07                              |
| LP(1)O28                                                                           | RY*(1)H42     | 0.11                              | LP(1)O40                                                                           | RY*(1)H14     | 0.21                              |
| LP(1)O28                                                                           | BD*(1)O40-H42 | 0.42                              | LP(1)O40                                                                           | BD*(1)C10-H14 | 0.14                              |
| LP(2)O28                                                                           | RY*(1)O40     | 0.07                              | LP(2)O40                                                                           | RY*(1)H14     | 0.08                              |
| LP(2)O28                                                                           | RY*(4)H42     | 0.34                              |                                                                                    |               |                                   |
| LP(2)O28                                                                           | RY*(8)H42     | 0.10                              |                                                                                    |               |                                   |
| LP(2)O28                                                                           | BD*(1)O40-H42 | <b>22.35</b>                      |                                                                                    |               |                                   |
| <b>From H<sub>2</sub>O<sup>e</sup> to H<sub>2</sub>O<sup>a</sup></b>               |               |                                   | <b>From H<sub>2</sub>O<sup>e</sup> to H<sub>2</sub>O<sup>d</sup></b>               |               |                                   |
| Donor NBO                                                                          | Acceptor NBO  | <i>E</i> <sup>(2)</sup> /kcal/mol | Donor NBO                                                                          | Acceptor NBO  | <i>E</i> <sup>(2)</sup> /kcal/mol |
| BD(1)O40-H41                                                                       | RY*(2)O28     | 0.09                              | BD(1)O40-H42                                                                       | RY*(5)H39     | 0.12                              |
|                                                                                    |               |                                   | BD(1)O40-H42                                                                       | BD*(1)O37-H39 | 0.20                              |
|                                                                                    |               |                                   | BD(1)O40-H41                                                                       | RY*(1)H39     | 0.08                              |
|                                                                                    |               |                                   | BD(1)O40-H41                                                                       | RY*(5)H39     | 0.12                              |
|                                                                                    |               |                                   | CR(1)O40                                                                           | BD*(1)O37-H39 | 0.08                              |
|                                                                                    |               |                                   | LP(1)O40                                                                           | BD*(1)O37-H39 | 0.32                              |
|                                                                                    |               |                                   | LP(2)O40                                                                           | RY*(1)O37     | 0.14                              |

|                                                                                    |               |                                   |                                                                      |               |                                   |
|------------------------------------------------------------------------------------|---------------|-----------------------------------|----------------------------------------------------------------------|---------------|-----------------------------------|
|                                                                                    |               |                                   | LP(2)O40                                                             | RY*(4)H39     | 0.32                              |
|                                                                                    |               |                                   | LP(2)O40                                                             | RY*(6)H39     | 0.17                              |
|                                                                                    |               |                                   | LP(2)O40                                                             | BD*(1)O37-H39 | <b>18.62</b>                      |
| <b>From H<sub>2</sub>O<sup>d</sup> to C<sub>9</sub>H<sub>16</sub>O<sub>2</sub></b> |               |                                   | <b>From H<sub>2</sub>O<sup>d</sup> to H<sub>2</sub>O<sup>c</sup></b> |               |                                   |
| Donor NBO                                                                          | Acceptor NBO  | <i>E</i> <sup>(2)</sup> /kcal/mol | Donor NBO                                                            | Acceptor NBO  | <i>E</i> <sup>(2)</sup> /kcal/mol |
| BD(1)O37-H38                                                                       | RY*(1)H12     | 0.24                              | BD(1)O37-H33                                                         | RY*(5)H36     | 0.09                              |
| BD(1)O37-H39                                                                       | RY*(2)H12     | 0.07                              | BD(1)O37-H34                                                         | RY*(5)H36     | 0.11                              |
| LP(1)O37                                                                           | RY*(1)H12     | 0.38                              | BD(1)O37-H34                                                         | BD*(1)O34-H36 | 0.11                              |
| LP(1)O37                                                                           | RY*(2)H12     | 0.08                              | LP(1)O37                                                             | RY*(1)H36     | 0.08                              |
| LP(1)O37                                                                           | BD*(1)C11-H12 | 0.42                              | LP(1)O37                                                             | BD*(1)O34-H36 | 0.16                              |
| LP(2)O37                                                                           | RY*(1)H12     | 0.07                              | LP(2)O37                                                             | RY*(1)O34     | 0.19                              |
| LP(2)O37                                                                           | BD*(1)C11-H12 | 0.07                              | LP(2)O37                                                             | RY*(4)H36     | 0.26                              |
|                                                                                    |               |                                   | LP(2)O37                                                             | RY*(5)H36     | 0.09                              |
|                                                                                    |               |                                   | LP(2)O37                                                             | BD*(1)O34-H36 | <b>14.25</b>                      |
| <b>From H<sub>2</sub>O<sup>d</sup> to H<sub>2</sub>O<sup>e</sup></b>               |               |                                   |                                                                      |               |                                   |
| Donor NBO                                                                          | Acceptor NBO  | <i>E</i> <sup>(2)</sup> /kcal/mol |                                                                      |               |                                   |
| BD(1)O37-H39                                                                       | BD*(1)O40-H41 | 0.15                              |                                                                      |               |                                   |
| LP(2)O37                                                                           | RY*(1)O40     | 0.06                              |                                                                      |               |                                   |

<sup>a</sup> The oxygen atom number 28 of water. <sup>b</sup> The oxygen atom number 31 of water. <sup>c</sup> The oxygen atom number 34 of water. <sup>d</sup> The oxygen atom number 37 of water. <sup>e</sup> The oxygen atom number 40 of water. <sup>f</sup> BD for 2-center bond, LP for 1-center valence lone pair the unstarred and starred labels corresponding to Lewis and non-Lewis NBOs, respectively. <sup>g</sup> RY\* for 1-center Rydberg, and BD\* for 2-center antibond, the unstarred and starred labels corresponding to Lewis and non-Lewis NBOs, respectively.

Table S13. Measured transition lines for 1,7DSU: Residual between observed frequency and that calculated (SPFIT) from the spectroscopic parameters (MHz), with the experimental accuracy of 0.005 MHz for all lines.

| $J'$ | $Ka'$ | $Kc'$ | $J''$ | $Ka''$ | $Kc''$ | $\nu_{\text{obs}}/\text{MHz}$ | $\Delta\nu_{\text{obs-calc}}/\text{kHz}$ |
|------|-------|-------|-------|--------|--------|-------------------------------|------------------------------------------|
| 2    | 2     | 0     | 1     | 1      | 1      | 7490.1054                     | 0.4                                      |
| 2    | 2     | 1     | 1     | 1      | 0      | 7457.6789                     | 0.3                                      |
| 3    | 3     | 0     | 2     | 2      | 1      | 11906.4332                    | -0.3                                     |
| 3    | 3     | 1     | 2     | 2      | 0      | 11905.8787                    | -1.1                                     |
| 4    | 1     | 4     | 3     | 0      | 3      | 7832.4768                     | -5.6                                     |
| 4    | 2     | 3     | 3     | 1      | 2      | 10677.5050                    | -3.2                                     |
| 4    | 3     | 1     | 3     | 2      | 2      | 13557.3497                    | 0.7                                      |
| 4    | 3     | 2     | 3     | 2      | 1      | 13554.5680                    | -2.2                                     |
| 4    | 4     | 0     | 3     | 3      | 1      | 16338.6309                    | -5.2                                     |
| 4    | 4     | 0     | 4     | 3      | 1      | 9738.2933                     | -4.0                                     |
| 4    | 4     | 1     | 3     | 3      | 0      | 16338.6309                    | 0.7                                      |
| 4    | 4     | 1     | 4     | 3      | 2      | 9738.3248                     | -13.6                                    |
| 5    | 0     | 5     | 4     | 1      | 4      | 6999.3882                     | 6.4                                      |
| 5    | 1     | 5     | 4     | 0      | 4      | 9405.7119                     | -5.6                                     |
| 5    | 2     | 4     | 4     | 1      | 3      | 12263.4446                    | -1.8                                     |
| 5    | 3     | 2     | 4     | 2      | 3      | 15209.5219                    | 2.4                                      |
| 5    | 3     | 3     | 4     | 2      | 2      | 15201.1520                    | 2.6                                      |
| 5    | 4     | 1     | 5     | 3      | 2      | 9737.5648                     | -4.9                                     |
| 5    | 4     | 2     | 5     | 3      | 3      | 9737.7331                     | -0.7                                     |
| 6    | 0     | 6     | 5     | 1      | 5      | 8712.2159                     | 1.8                                      |
| 6    | 1     | 6     | 5     | 0      | 5      | 10966.5615                    | -2.3                                     |
| 6    | 2     | 5     | 5     | 1      | 4      | 13833.5399                    | 0.2                                      |
| 6    | 3     | 3     | 5     | 2      | 4      | 16863.7140                    | 3.0                                      |
| 6    | 3     | 4     | 5     | 2      | 3      | 16844.1094                    | 3.4                                      |
| 6    | 4     | 2     | 6     | 3      | 3      | 9736.2536                     | -0.6                                     |
| 6    | 4     | 3     | 6     | 3      | 4      | 9736.7466                     | 1.1                                      |
| 6    | 5     | 1     | 6     | 4      | 2      | 12520.3529                    | -2.8                                     |
| 6    | 5     | 2     | 6     | 4      | 3      | 12520.3529                    | -5.1                                     |
| 7    | 0     | 7     | 6     | 1      | 6      | 10431.7009                    | -2.7                                     |
| 7    | 1     | 7     | 6     | 0      | 6      | 12516.9531                    | 4.4                                      |
| 7    | 4     | 3     | 7     | 3      | 4      | 9734.0597                     | 3.5                                      |
| 7    | 4     | 4     | 7     | 3      | 5      | 9735.2853                     | 4.6                                      |
| 7    | 5     | 2     | 7     | 4      | 3      | 12519.5675                    | -1.7                                     |
| 7    | 5     | 3     | 7     | 4      | 4      | 12519.5774                    | -0.5                                     |
| 8    | 0     | 8     | 7     | 1      | 7      | 12155.1784                    | 0.2                                      |
| 8    | 1     | 8     | 7     | 0      | 7      | 14059.1465                    | 2.0                                      |
| 8    | 4     | 4     | 8     | 3      | 5      | 9730.5936                     | 5.8                                      |
| 8    | 4     | 5     | 8     | 3      | 6      | 9733.2790                     | 7.8                                      |
| 8    | 5     | 3     | 8     | 4      | 4      | 12518.3983                    | 7.3                                      |
| 8    | 5     | 4     | 8     | 4      | 5      | 12518.4159                    | -0.9                                     |
| 9    | 0     | 9     | 8     | 1      | 8      | 13879.8655                    | -3.6                                     |

Table S14. Measured transition lines for 1,7DSU $\cdots$ H<sub>2</sub>O: Residual between observed frequency and that calculated (SPFIT) from the spectroscopic parameters (MHz), with the experimental accuracy of 0.005 MHz for all lines.

| $J'$ | $Ka'$ | $Kc'$ | $J''$ | $Ka''$ | $Kc''$ | $\nu_{\text{obs}}/\text{MHz}$ | $\Delta\nu_{\text{obs-calc}}/\text{kHz}$ |
|------|-------|-------|-------|--------|--------|-------------------------------|------------------------------------------|
| 4    | 4     | 0     | 3     | 3      | 1      | 9260.5862                     | -1.8                                     |
| 4    | 4     | 0     | 3     | 3      | 0      | 9256.4625                     | -0.2                                     |
| 4    | 4     | 1     | 3     | 3      | 0      | 9256.0113                     | -0.8                                     |
| 4    | 4     | 1     | 3     | 3      | 1      | 9260.1372                     | -0.2                                     |
| 5    | 0     | 5     | 4     | 0      | 4      | 6403.162                      | -0.9                                     |
| 5    | 0     | 5     | 4     | 1      | 4      | 6283.8827                     | 3.0                                      |
| 5    | 1     | 4     | 4     | 1      | 3      | 7019.7546                     | 2.2                                      |
| 5    | 1     | 5     | 4     | 1      | 4      | 6342.1473                     | -0.2                                     |
| 5    | 1     | 5     | 4     | 0      | 4      | 6461.4304                     | -0.3                                     |
| 5    | 2     | 3     | 4     | 2      | 2      | 7166.9457                     | -0.6                                     |
| 5    | 2     | 4     | 4     | 2      | 3      | 6752.2922                     | 0.9                                      |
| 5    | 3     | 2     | 4     | 3      | 1      | 6971.2903                     | 0.1                                      |
| 5    | 3     | 3     | 4     | 3      | 2      | 6892.6047                     | 0.8                                      |
| 5    | 4     | 1     | 4     | 3      | 2      | 10645.5087                    | -1.9                                     |
| 5    | 4     | 1     | 4     | 3      | 1      | 10617.3631                    | -0.5                                     |
| 5    | 4     | 2     | 4     | 3      | 1      | 10613.3756                    | -0.1                                     |
| 5    | 4     | 2     | 4     | 3      | 2      | 10641.5219                    | -0.7                                     |
| 5    | 5     | 0     | 4     | 4      | 0      | 11707.0385                    | 2.2                                      |
| 5    | 5     | 1     | 4     | 4      | 1      | 11707.4414                    | -1.1                                     |
| 6    | 0     | 6     | 5     | 0      | 5      | 7602.1002                     | -0.2                                     |
| 6    | 0     | 6     | 5     | 1      | 5      | 7543.833                      | 0.5                                      |
| 6    | 1     | 5     | 5     | 1      | 4      | 8292.4363                     | 0.5                                      |
| 6    | 1     | 5     | 5     | 2      | 4      | 7615.7511                     | -0.3                                     |
| 6    | 1     | 6     | 5     | 1      | 5      | 7570.267                      | -2.9                                     |
| 6    | 1     | 6     | 5     | 0      | 5      | 7628.5388                     | 1.1                                      |
| 6    | 2     | 4     | 5     | 2      | 3      | 8617.3463                     | -0.2                                     |
| 6    | 2     | 5     | 5     | 2      | 4      | 8049.226                      | 0.4                                      |
| 6    | 3     | 3     | 5     | 3      | 2      | 8452.7426                     | -1.1                                     |
| 6    | 3     | 3     | 5     | 2      | 3      | 10688.7088                    | 2.4                                      |
| 6    | 3     | 4     | 5     | 3      | 3      | 8267.7679                     | -0.3                                     |
| 6    | 4     | 2     | 5     | 4      | 1      | 8302.3611                     | -1.0                                     |
| 6    | 4     | 2     | 5     | 3      | 2      | 11948.437                     | 1.4                                      |
| 6    | 4     | 3     | 5     | 4      | 2      | 8286.9931                     | -0.6                                     |
| 6    | 4     | 3     | 5     | 3      | 3      | 12035.911                     | -1.5                                     |
| 6    | 5     | 1     | 5     | 4      | 2      | 13082.4772                    | 3.0                                      |
| 6    | 5     | 1     | 5     | 4      | 1      | 13078.4855                    | -0.7                                     |
| 6    | 5     | 2     | 5     | 4      | 1      | 13078.0023                    | -1.4                                     |
| 6    | 5     | 2     | 5     | 4      | 2      | 13081.991                     | -0.7                                     |
| 6    | 6     | 0     | 5     | 5      | 1      | 14155.8845                    | -2.1                                     |
| 6    | 6     | 0     | 5     | 5      | 0      | 14155.8439                    | 1.8                                      |
| 6    | 6     | 1     | 5     | 5      | 0      | 14155.8439                    | 5.9                                      |

---

|   |   |   |   |   |   |            |      |
|---|---|---|---|---|---|------------|------|
| 6 | 6 | 1 | 5 | 5 | 1 | 14155.8845 | 2.0  |
| 7 | 0 | 7 | 6 | 0 | 6 | 8806.0604  | 0.3  |
| 7 | 0 | 7 | 6 | 1 | 6 | 8779.6228  | 0.1  |
| 7 | 1 | 6 | 6 | 1 | 5 | 9508.1601  | 0.4  |
| 7 | 1 | 7 | 6 | 1 | 6 | 8791.0356  | -1.4 |
| 7 | 1 | 7 | 6 | 0 | 6 | 8817.4754  | 1.1  |
| 7 | 2 | 5 | 6 | 2 | 4 | 10018.643  | -0.1 |
| 7 | 2 | 6 | 6 | 2 | 5 | 9323.1211  | -0.6 |
| 7 | 3 | 4 | 6 | 3 | 3 | 9966.2191  | 0.2  |
| 7 | 3 | 4 | 6 | 2 | 4 | 12037.5773 | -1.5 |
| 7 | 3 | 5 | 6 | 3 | 4 | 9626.885   | 1.4  |
| 7 | 4 | 3 | 6 | 4 | 2 | 9735.6385  | -0.4 |
| 7 | 4 | 3 | 6 | 3 | 3 | 13231.3331 | 2.3  |
| 7 | 4 | 4 | 6 | 4 | 3 | 9687.4562  | 1.6  |
| 7 | 4 | 4 | 6 | 3 | 4 | 13455.5993 | 0.5  |
| 7 | 5 | 2 | 6 | 5 | 1 | 9664.3072  | 2.4  |
| 7 | 5 | 2 | 6 | 4 | 2 | 14440.4276 | -1.3 |
| 7 | 5 | 3 | 6 | 5 | 2 | 9661.9533  | 0.7  |
| 7 | 5 | 3 | 6 | 4 | 3 | 14456.9477 | -2.8 |
| 7 | 6 | 1 | 6 | 5 | 1 | 15529.3898 | -1.6 |
| 7 | 6 | 2 | 6 | 5 | 2 | 15529.8189 | -2.1 |
| 7 | 7 | 0 | 6 | 6 | 1 | 16604.2233 | -1.2 |
| 7 | 7 | 0 | 6 | 6 | 0 | 16604.2233 | 2.9  |
| 7 | 7 | 1 | 6 | 6 | 0 | 16604.2233 | 3.2  |
| 7 | 7 | 1 | 6 | 6 | 1 | 16604.2233 | -0.9 |
| 8 | 0 | 8 | 7 | 0 | 7 | 10014.3178 | -0.7 |
| 8 | 1 | 7 | 7 | 1 | 6 | 10695.1287 | 1.0  |
| 8 | 1 | 7 | 7 | 2 | 6 | 10446.6919 | 0.4  |
| 8 | 1 | 8 | 7 | 1 | 7 | 10007.6627 | 0.2  |
| 8 | 2 | 6 | 7 | 2 | 5 | 11356.2294 | -0.6 |
| 8 | 2 | 7 | 7 | 2 | 6 | 10576.4441 | -0.5 |
| 8 | 2 | 7 | 7 | 1 | 6 | 10824.8773 | -3.5 |
| 8 | 3 | 5 | 7 | 3 | 4 | 11477.369  | 0.8  |
| 8 | 3 | 5 | 7 | 2 | 5 | 13496.3036 | -0.3 |
| 8 | 3 | 6 | 7 | 3 | 5 | 10963.8725 | 0.2  |
| 8 | 4 | 4 | 7 | 4 | 3 | 11205.7364 | -1.4 |
| 8 | 4 | 5 | 7 | 4 | 4 | 11086.1379 | -0.4 |
| 8 | 5 | 3 | 7 | 5 | 2 | 11075.6214 | 0.5  |
| 8 | 5 | 3 | 7 | 4 | 3 | 15780.4105 | -0.4 |
| 8 | 5 | 4 | 7 | 5 | 3 | 11066.5582 | -2.0 |
| 8 | 5 | 4 | 7 | 4 | 4 | 15836.0586 | 2.5  |
| 8 | 6 | 2 | 7 | 5 | 2 | 16899.4822 | -0.2 |
| 8 | 6 | 3 | 7 | 5 | 3 | 16901.9505 | -2.7 |
| 8 | 8 | 0 | 7 | 7 | 0 | 19052.3051 | -1.4 |

---



---

|    |   |    |    |   |    |            |      |
|----|---|----|----|---|----|------------|------|
| 8  | 8 | 1  | 7  | 7 | 1  | 19052.3051 | -1.8 |
| 9  | 0 | 9  | 8  | 0 | 8  | 11225.0227 | 0.6  |
| 9  | 1 | 8  | 8  | 1 | 7  | 11880.1655 | 0.9  |
| 9  | 1 | 9  | 8  | 1 | 8  | 11222.1956 | -0.9 |
| 9  | 2 | 7  | 8  | 2 | 6  | 12621.7225 | 1.0  |
| 9  | 2 | 8  | 8  | 2 | 7  | 11813.6455 | -0.6 |
| 9  | 3 | 6  | 8  | 3 | 5  | 12950.6758 | 1.3  |
| 9  | 3 | 7  | 8  | 3 | 6  | 12275.2589 | -0.5 |
| 9  | 4 | 5  | 8  | 4 | 4  | 12719.1403 | -2.2 |
| 9  | 4 | 6  | 8  | 4 | 5  | 12475.4603 | -1.8 |
| 9  | 5 | 4  | 8  | 5 | 3  | 12505.3194 | 1.4  |
| 9  | 5 | 4  | 8  | 4 | 4  | 17079.992  | 0.9  |
| 9  | 5 | 5  | 8  | 5 | 4  | 12477.5129 | 0.7  |
| 9  | 5 | 5  | 8  | 4 | 5  | 17227.4302 | 0.2  |
| 9  | 6 | 3  | 8  | 5 | 3  | 18261.742  | -0.1 |
| 9  | 6 | 4  | 8  | 5 | 4  | 18271.8615 | 0.4  |
| 10 | 0 | 10 | 9  | 0 | 9  | 12436.9243 | 0.2  |
| 10 | 1 | 9  | 9  | 1 | 8  | 13073.6771 | 0.7  |
| 10 | 1 | 9  | 9  | 2 | 8  | 13010.4394 | -2.4 |
| 10 | 1 | 10 | 9  | 1 | 9  | 12435.7583 | -2.5 |
| 10 | 2 | 8  | 9  | 2 | 7  | 13825.3142 | 2.8  |
| 10 | 2 | 9  | 9  | 2 | 8  | 13039.7497 | -0.5 |
| 10 | 3 | 7  | 9  | 3 | 6  | 14363.4844 | -0.4 |
| 10 | 3 | 8  | 9  | 3 | 7  | 13560.6238 | -0.9 |
| 10 | 4 | 6  | 9  | 4 | 5  | 14262.3409 | -1.0 |
| 10 | 4 | 7  | 9  | 4 | 6  | 13847.5863 | 2.2  |
| 10 | 5 | 5  | 9  | 5 | 4  | 13962.7867 | 0.9  |
| 11 | 0 | 11 | 10 | 0 | 10 | 13649.3724 | -1.0 |
| 11 | 1 | 10 | 10 | 1 | 9  | 14275.3137 | 2.7  |
| 11 | 1 | 11 | 10 | 1 | 10 | 13648.9072 | 1.7  |
| 11 | 2 | 9  | 10 | 2 | 8  | 14997.4434 | -3.8 |
| 11 | 2 | 10 | 10 | 2 | 9  | 14259.0906 | 2.3  |

---

Table S15. Measured Transition Lines for 1,7DSU $\cdots$ H<sub>2</sub><sup>18</sup>O: Residual between observed frequency and that calculated (SPFIT) from the spectroscopic parameters (MHz), with the experimental accuracy of 0.005 MHz for all lines.

| $J'$ | $Ka'$ | $Kc'$ | $J''$ | $Ka''$ | $Kc''$ | $\nu_{\text{obs}}/\text{MHz}$ | $\Delta\nu_{\text{obs-calc}}/\text{kHz}$ |
|------|-------|-------|-------|--------|--------|-------------------------------|------------------------------------------|
| 4    | 4     | 0     | 3     | 3      | 1      | 8963.5314                     | -4.7                                     |
| 4    | 4     | 0     | 3     | 3      | 0      | 8958.3093                     | 0.1                                      |
| 4    | 4     | 1     | 3     | 3      | 0      | 8957.6775                     | -1.7                                     |
| 4    | 4     | 1     | 3     | 3      | 1      | 8962.9059                     | -0.2                                     |
| 5    | 0     | 5     | 4     | 0      | 4      | 6239.7335                     | 1.1                                      |
| 5    | 1     | 4     | 4     | 1      | 3      | 6879.8371                     | 2.7                                      |
| 5    | 1     | 5     | 4     | 1      | 4      | 6187.473                      | 0.2                                      |
| 5    | 2     | 3     | 4     | 1      | 3      | 8356.1467                     | 0.2                                      |
| 5    | 3     | 2     | 4     | 2      | 2      | 9133.6157                     | 2.4                                      |
| 5    | 3     | 3     | 4     | 2      | 3      | 9451.5079                     | 0.9                                      |
| 5    | 4     | 1     | 4     | 3      | 2      | 10328.0911                    | -1.1                                     |
| 5    | 4     | 1     | 4     | 3      | 1      | 10292.6339                    | -0.2                                     |
| 5    | 4     | 2     | 4     | 3      | 1      | 10287.0794                    | 0.3                                      |
| 5    | 4     | 2     | 4     | 3      | 2      | 10322.5376                    | 0.4                                      |
| 5    | 5     | 0     | 4     | 4      | 0      | 11327.6229                    | -1.1                                     |
| 5    | 5     | 1     | 4     | 4      | 1      | 11328.1858                    | 0.3                                      |
| 6    | 0     | 6     | 5     | 0      | 5      | 7407.368                      | 0.8                                      |
| 6    | 1     | 5     | 5     | 1      | 4      | 8106.0915                     | 0.2                                      |
| 6    | 1     | 6     | 5     | 1      | 5      | 7381.8886                     | 0.9                                      |
| 6    | 2     | 4     | 5     | 1      | 4      | 9960.6091                     | -2.9                                     |
| 6    | 3     | 3     | 5     | 2      | 3      | 10411.314                     | 1.9                                      |
| 6    | 3     | 4     | 5     | 2      | 4      | 10956.7296                    | -0.2                                     |
| 6    | 4     | 2     | 5     | 3      | 3      | 11725.1646                    | 0.2                                      |
| 6    | 4     | 2     | 5     | 3      | 2      | 11592.1824                    | 0.1                                      |
| 6    | 4     | 3     | 5     | 3      | 2      | 11565.4036                    | -0.3                                     |
| 6    | 4     | 3     | 5     | 3      | 3      | 11698.3878                    | 1.8                                      |
| 6    | 5     | 1     | 5     | 4      | 2      | 12680.161                     | -0.4                                     |
| 6    | 5     | 1     | 5     | 4      | 1      | 12674.6051                    | -1.4                                     |
| 6    | 5     | 2     | 5     | 4      | 1      | 12673.8629                    | -1.5                                     |
| 6    | 5     | 2     | 5     | 4      | 2      | 12679.4185                    | -0.9                                     |
| 6    | 6     | 0     | 5     | 5      | 0      | 13694.8243                    | 4.5                                      |
| 6    | 6     | 1     | 5     | 5      | 1      | 13694.8786                    | -2.7                                     |
| 7    | 0     | 7     | 6     | 0      | 6      | 8580.6549                     | 1.4                                      |
| 7    | 0     | 7     | 6     | 1      | 6      | 8561.6312                     | 2.1                                      |
| 7    | 1     | 6     | 6     | 1      | 5      | 9277.2871                     | -1.2                                     |
| 7    | 1     | 7     | 6     | 1      | 6      | 8569.3741                     | 0.1                                      |
| 7    | 1     | 7     | 6     | 0      | 6      | 8588.3998                     | 1.4                                      |
| 7    | 2     | 5     | 6     | 2      | 4      | 9843.346                      | 1.2                                      |
| 7    | 2     | 5     | 6     | 1      | 5      | 11697.8632                    | -2.2                                     |
| 7    | 2     | 6     | 6     | 2      | 5      | 9116.4181                     | -1.0                                     |
| 7    | 3     | 4     | 6     | 3      | 3      | 9843.3718                     | -1.4                                     |

---

|    |   |    |   |   |   |            |      |
|----|---|----|---|---|---|------------|------|
| 7  | 3 | 4  | 6 | 2 | 4 | 11770.3877 | 2.3  |
| 7  | 3 | 5  | 6 | 3 | 4 | 9449.0216  | -1.6 |
| 7  | 3 | 5  | 6 | 2 | 5 | 12527.0802 | -0.8 |
| 7  | 4 | 3  | 6 | 4 | 2 | 9593.0239  | 0.2  |
| 7  | 4 | 3  | 6 | 3 | 3 | 12840.895  | 2.3  |
| 7  | 4 | 4  | 6 | 4 | 3 | 9527.4739  | -2.1 |
| 7  | 4 | 4  | 6 | 3 | 4 | 13104.5886 | 0.9  |
| 7  | 5 | 2  | 6 | 4 | 2 | 14009.5696 | -0.3 |
| 7  | 5 | 3  | 6 | 4 | 3 | 14032.0089 | -0.4 |
| 7  | 6 | 1  | 6 | 5 | 1 | 15044.5176 | 1.4  |
| 7  | 6 | 2  | 6 | 5 | 2 | 15045.1681 | -0.4 |
| 7  | 7 | 0  | 6 | 6 | 1 | 16061.5092 | -3.7 |
| 7  | 7 | 0  | 6 | 6 | 0 | 16061.5087 | 2.8  |
| 7  | 7 | 1  | 6 | 6 | 0 | 16061.5092 | 3.9  |
| 7  | 7 | 1  | 6 | 6 | 1 | 16061.5087 | -3.6 |
| 8  | 0 | 8  | 7 | 0 | 7 | 9757.9194  | 2.3  |
| 8  | 0 | 8  | 7 | 1 | 7 | 9750.1726  | 0.4  |
| 8  | 1 | 7  | 7 | 1 | 6 | 10428.2999 | -2.9 |
| 8  | 1 | 8  | 7 | 1 | 7 | 9753.2183  | 0.1  |
| 8  | 1 | 8  | 7 | 0 | 7 | 9760.9619  | -1.2 |
| 8  | 2 | 6  | 7 | 2 | 5 | 11128.2746 | -1.4 |
| 8  | 2 | 7  | 7 | 2 | 6 | 10332.9997 | -2.3 |
| 8  | 3 | 5  | 7 | 3 | 4 | 11325.7428 | 1.4  |
| 8  | 3 | 5  | 7 | 2 | 5 | 13252.7854 | 3.4  |
| 8  | 3 | 6  | 7 | 3 | 5 | 10750.7778 | -2.5 |
| 8  | 4 | 4  | 7 | 4 | 3 | 11059.2897 | 1.3  |
| 8  | 4 | 4  | 7 | 3 | 4 | 14056.8091 | 1.1  |
| 8  | 4 | 5  | 7 | 4 | 4 | 10900.8359 | -0.4 |
| 8  | 4 | 5  | 7 | 3 | 5 | 14556.4023 | 1.5  |
| 8  | 5 | 3  | 7 | 4 | 3 | 15317.0384 | -2.4 |
| 8  | 5 | 4  | 7 | 4 | 4 | 15391.2959 | 2.3  |
| 8  | 6 | 2  | 7 | 5 | 2 | 16389.8999 | -0.7 |
| 8  | 6 | 3  | 7 | 5 | 3 | 16393.6256 | 1.4  |
| 9  | 0 | 9  | 8 | 0 | 8 | 10937.2291 | 1.8  |
| 9  | 1 | 8  | 8 | 1 | 7 | 11583.5186 | -2.0 |
| 9  | 1 | 9  | 8 | 1 | 8 | 10935.351  | 2.1  |
| 9  | 2 | 7  | 8 | 2 | 6 | 12335.5864 | 0.6  |
| 9  | 2 | 8  | 8 | 2 | 7 | 11533.9953 | -4.4 |
| 9  | 3 | 6  | 8 | 3 | 5 | 12755.6819 | 2.5  |
| 9  | 3 | 7  | 8 | 3 | 6 | 12023.7747 | -3.6 |
| 9  | 4 | 5  | 8 | 4 | 4 | 12570.451  | 2.4  |
| 9  | 4 | 6  | 8 | 4 | 5 | 12260.5326 | -2.3 |
| 10 | 0 | 10 | 9 | 0 | 9 | 12117.4698 | 0.3  |
| 10 | 1 | 9  | 9 | 1 | 8 | 12748.5726 | -4.2 |

---

---

|    |   |    |    |   |    |            |     |
|----|---|----|----|---|----|------------|-----|
| 10 | 1 | 10 | 9  | 1 | 9  | 12116.7424 | 1.8 |
| 11 | 0 | 11 | 10 | 0 | 10 | 13298.1126 | 0.7 |
| 11 | 1 | 11 | 10 | 1 | 10 | 13297.8369 | 1.5 |

---

Table S16. Measured transition lines for 1,7DSU $\cdots$ D<sub>2</sub>O: Residual between observed frequency and that calculated (SPFIT) from the spectroscopic parameters (MHz), with the experimental accuracy of 0.005 MHz for all lines.

| $J'$ | $Ka'$ | $Kc'$ | $J''$ | $Ka''$ | $Kc''$ | $\nu_{\text{obs}}/\text{MHz}$ | $\Delta\nu_{\text{obs-calc}}/\text{kHz}$ |
|------|-------|-------|-------|--------|--------|-------------------------------|------------------------------------------|
| 4    | 4     | 0     | 3     | 3      | 1      | 8956.3157                     | 7.0                                      |
| 4    | 4     | 0     | 3     | 3      | 0      | 8950.9869                     | -1.4                                     |
| 4    | 4     | 1     | 3     | 3      | 0      | 8950.3415                     | -0.4                                     |
| 4    | 4     | 1     | 3     | 3      | 1      | 8955.6614                     | -0.9                                     |
| 5    | 3     | 2     | 4     | 2      | 2      | 9135.6259                     | -2.9                                     |
| 5    | 3     | 3     | 4     | 2      | 3      | 9454.8053                     | 6.2                                      |
| 5    | 4     | 1     | 4     | 3      | 1      | 10288.5072                    | -3.7                                     |
| 5    | 4     | 2     | 4     | 3      | 2      | 10318.8843                    | -2.4                                     |
| 5    | 5     | 0     | 4     | 4      | 0      | 11317.8033                    | 4.6                                      |
| 5    | 5     | 1     | 4     | 4      | 1      | 11318.3623                    | -11.9                                    |
| 6    | 0     | 6     | 5     | 0      | 5      | 7424.624                      | 2.6                                      |
| 6    | 1     | 5     | 5     | 1      | 4      | 8122.8334                     | -3.1                                     |
| 6    | 1     | 6     | 5     | 1      | 5      | 7399.656                      | 0.6                                      |
| 6    | 2     | 4     | 5     | 2      | 3      | 8504.928                      | -0.9                                     |
| 6    | 2     | 5     | 5     | 2      | 4      | 7897.1567                     | -2.8                                     |
| 6    | 3     | 3     | 5     | 2      | 3      | 10418.3408                    | -3.9                                     |
| 6    | 4     | 2     | 5     | 3      | 2      | 11590.8928                    | -2.8                                     |
| 6    | 4     | 3     | 5     | 3      | 3      | 11698.5898                    | -0.9                                     |
| 6    | 5     | 1     | 5     | 4      | 1      | 12668.1415                    | 0.1                                      |
| 6    | 5     | 2     | 5     | 4      | 1      | 12667.3793                    | 5.2                                      |
| 6    | 5     | 2     | 5     | 4      | 2      | 12673.0736                    | 1.8                                      |
| 6    | 6     | 0     | 5     | 5      | 0      | 13682.4923                    | 5.0                                      |
| 6    | 6     | 1     | 5     | 5      | 1      | 13682.5533                    | 2.4                                      |
| 7    | 0     | 7     | 6     | 0      | 6      | 8601.0153                     | 0.5                                      |
| 7    | 0     | 7     | 6     | 1      | 6      | 8582.5337                     | -1.5                                     |
| 7    | 1     | 6     | 6     | 1      | 5      | 9296.1039                     | 6.6                                      |
| 7    | 1     | 7     | 6     | 1      | 6      | 8590.0212                     | -0.1                                     |
| 7    | 1     | 7     | 6     | 0      | 6      | 8608.5023                     | 1.4                                      |
| 7    | 2     | 5     | 6     | 2      | 4      | 9865.7271                     | 1.9                                      |
| 7    | 2     | 6     | 6     | 2      | 5      | 9137.4546                     | 0.0                                      |
| 7    | 5     | 2     | 6     | 4      | 2      | 14006.2526                    | 0.8                                      |
| 7    | 5     | 3     | 6     | 4      | 3      | 14029.2168                    | 0.0                                      |
| 7    | 7     | 0     | 6     | 6      | 1      | 16046.6919                    | -5.9                                     |
| 7    | 7     | 0     | 6     | 6      | 0      | 16046.6919                    | 1.4                                      |
| 7    | 7     | 1     | 6     | 6      | 0      | 16046.6919                    | 2.1                                      |
| 7    | 7     | 1     | 6     | 6      | 1      | 16046.6919                    | -5.2                                     |
| 8    | 0     | 8     | 7     | 0      | 7      | 9781.3508                     | 1.6                                      |
| 8    | 0     | 8     | 7     | 1      | 7      | 9773.8623                     | -0.8                                     |
| 8    | 1     | 7     | 7     | 1      | 6      | 10449.9466                    | -0.1                                     |
| 8    | 1     | 8     | 7     | 1      | 7      | 9776.7912                     | -1.7                                     |
| 8    | 1     | 8     | 7     | 0      | 7      | 9784.2772                     | -1.8                                     |

---

|   |   |   |   |   |   |            |      |
|---|---|---|---|---|---|------------|------|
| 8 | 2 | 6 | 7 | 2 | 5 | 11151.6489 | -0.7 |
| 8 | 2 | 7 | 7 | 2 | 6 | 10356.5854 | 0.3  |

---

Table S17. Measured transition lines for 1,7DSU...HDO: Residual between observed frequency and that calculated (SPFIT) from the spectroscopic parameters (MHz), with the experimental accuracy of 0.005 MHz for all lines.

| $J'$ | $Ka'$ | $Kc'$ | $J''$ | $Ka''$ | $Kc''$ | $\nu_{\text{obs}}/\text{MHz}$ | $\Delta\nu_{\text{obs-cal}}/\text{kHz}$ |
|------|-------|-------|-------|--------|--------|-------------------------------|-----------------------------------------|
| 4    | 4     | 0     | 3     | 3      | 1      | 9178.8728                     | 0.6                                     |
| 4    | 4     | 0     | 3     | 3      | 0      | 9174.4677                     | -0.4                                    |
| 4    | 4     | 1     | 3     | 3      | 0      | 9173.9718                     | -2.0                                    |
| 4    | 4     | 1     | 3     | 3      | 1      | 9178.3784                     | 0.6                                     |
| 5    | 1     | 4     | 4     | 1      | 3      | 6985.7931                     | -2.5                                    |
| 5    | 3     | 2     | 4     | 2      | 2      | 9330.4206                     | -4.8                                    |
| 5    | 3     | 3     | 4     | 2      | 3      | 9632.3194                     | -3.0                                    |
| 5    | 4     | 1     | 4     | 3      | 1      | 10528.9416                    | 1.4                                     |
| 5    | 4     | 2     | 4     | 3      | 2      | 10554.5735                    | 0.3                                     |
| 5    | 5     | 0     | 4     | 4      | 0      | 11602.575                     | 0.9                                     |
| 5    | 5     | 1     | 4     | 4      | 1      | 11603.0175                    | -0.9                                    |
| 6    | 0     | 6     | 5     | 0      | 5      | 7553.9275                     | 0.4                                     |
| 6    | 1     | 5     | 5     | 1      | 4      | 8246.7148                     | -2.9                                    |
| 6    | 1     | 6     | 5     | 1      | 5      | 7523.9625                     | 1.8                                     |
| 6    | 2     | 4     | 5     | 2      | 3      | 8586.0232                     | 1.6                                     |
| 6    | 2     | 5     | 5     | 2      | 4      | 8007.6764                     | 0.6                                     |
| 6    | 3     | 3     | 5     | 2      | 3      | 10614.4299                    | 4.3                                     |
| 6    | 4     | 2     | 5     | 3      | 2      | 11852.2564                    | 1.5                                     |
| 6    | 4     | 3     | 5     | 3      | 3      | 11944.6075                    | 0.5                                     |
| 6    | 5     | 1     | 5     | 4      | 1      | 12968.146                     | 0.3                                     |
| 6    | 5     | 2     | 5     | 4      | 1      | 12967.6055                    | 3.5                                     |
| 6    | 5     | 2     | 5     | 4      | 2      | 12971.9732                    | -0.1                                    |
| 6    | 6     | 0     | 5     | 5      | 1      | 14028.8714                    | -6.0                                    |
| 6    | 6     | 0     | 5     | 5      | 0      | 14028.8287                    | 1.4                                     |
| 6    | 6     | 1     | 5     | 5      | 0      | 14028.8287                    | 6.2                                     |
| 6    | 6     | 1     | 5     | 5      | 1      | 14028.8714                    | -1.2                                    |
| 7    | 0     | 7     | 6     | 0      | 6      | 8750.3911                     | 2.4                                     |
| 7    | 0     | 7     | 6     | 1      | 6      | 8726.2256                     | 1.0                                     |
| 7    | 1     | 6     | 6     | 1      | 5      | 9450.938                      | -2.4                                    |
| 7    | 1     | 7     | 6     | 1      | 6      | 8736.492                      | 0.6                                     |
| 7    | 1     | 7     | 6     | 0      | 6      | 8760.656                      | 0.6                                     |
| 7    | 2     | 5     | 6     | 2      | 4      | 9976.86                       | 1.1                                     |
| 7    | 2     | 6     | 6     | 2      | 5      | 9272.579                      | -1.1                                    |
| 7    | 5     | 2     | 6     | 4      | 2      | 14323.5783                    | 0.9                                     |
| 7    | 5     | 3     | 6     | 4      | 3      | 14341.5641                    | -3.1                                    |
| 7    | 7     | 0     | 6     | 6      | 1      | 16454.6413                    | -3.0                                    |
| 7    | 7     | 0     | 6     | 6      | 0      | 16454.6413                    | 1.7                                     |
| 7    | 7     | 1     | 6     | 6      | 0      | 16454.6413                    | 2.2                                     |
| 7    | 7     | 1     | 6     | 6      | 1      | 16454.6413                    | -2.6                                    |
| 8    | 0     | 8     | 7     | 0      | 7      | 9951.0732                     | -0.1                                    |
| 8    | 0     | 8     | 7     | 1      | 7      | 9940.8051                     | -1.4                                    |

---

|   |   |   |   |   |   |            |      |
|---|---|---|---|---|---|------------|------|
| 8 | 1 | 7 | 7 | 1 | 6 | 10628.6655 | -2.9 |
| 8 | 1 | 8 | 7 | 1 | 7 | 9945.0184  | -0.7 |
| 8 | 1 | 8 | 7 | 0 | 7 | 9955.2872  | 1.4  |
| 8 | 2 | 6 | 7 | 2 | 5 | 11301.1944 | 0.8  |
| 8 | 2 | 7 | 7 | 2 | 6 | 10516.7223 | 0.7  |

---



Table S18. Measured transition lines for 1,7DSU···DHO: Residual between observed frequency and that calculated (SPFIT) from the spectroscopic parameters (MHz), with the experimental accuracy of 0.005 MHz for all lines.

| $J'$ | $Ka'$ | $Kc'$ | $J''$ | $Ka''$ | $Kc''$ | $\nu_{\text{obs}}/\text{MHz}$ | $\Delta\nu_{\text{obs-calc}}/\text{kHz}$ |
|------|-------|-------|-------|--------|--------|-------------------------------|------------------------------------------|
| 4    | 4     | 0     | 3     | 3      | 0      | 9026.1262                     | -0.9                                     |
| 4    | 4     | 1     | 3     | 3      | 1      | 9030.5493                     | -1.7                                     |
| 5    | 3     | 2     | 4     | 2      | 2      | 9202.0121                     | 0.4                                      |
| 5    | 3     | 3     | 4     | 2      | 3      | 9516.0903                     | 2.1                                      |
| 5    | 4     | 1     | 4     | 3      | 1      | 10369.9104                    | -3.5                                     |
| 5    | 4     | 2     | 4     | 3      | 2      | 10398.747                     | -0.5                                     |
| 5    | 5     | 0     | 4     | 4      | 0      | 11413.4712                    | 3.5                                      |
| 5    | 5     | 1     | 4     | 4      | 1      | 11413.9999                    | 1.0                                      |
| 6    | 0     | 6     | 5     | 0      | 5      | 7470.4116                     | 1.9                                      |
| 6    | 1     | 5     | 5     | 1      | 4      | 8167.6746                     | -5.2                                     |
| 6    | 1     | 6     | 5     | 1      | 5      | 7443.9262                     | 0.9                                      |
| 6    | 2     | 4     | 5     | 2      | 3      | 8536.4832                     | -2.0                                     |
| 6    | 2     | 5     | 5     | 2      | 4      | 7937.4626                     | 1.5                                      |
| 6    | 3     | 3     | 5     | 2      | 3      | 10485.6914                    | 1.3                                      |
| 6    | 4     | 2     | 5     | 3      | 2      | 11679.8013                    | 0.8                                      |
| 6    | 4     | 3     | 5     | 3      | 3      | 11782.5721                    | 0.8                                      |
| 6    | 5     | 1     | 5     | 4      | 1      | 12769.5234                    | 0.3                                      |
| 6    | 5     | 2     | 5     | 4      | 2      | 12774.0809                    | -1.6                                     |
| 6    | 6     | 0     | 5     | 5      | 1      | 13798.8314                    | -6.5                                     |
| 6    | 6     | 0     | 5     | 5      | 0      | 13798.774                     | -0.3                                     |
| 6    | 6     | 1     | 5     | 5      | 0      | 13798.774                     | 6.1                                      |
| 6    | 6     | 1     | 5     | 5      | 1      | 13798.8314                    | -0.1                                     |
| 7    | 0     | 7     | 6     | 0      | 6      | 8653.9398                     | 2.4                                      |
| 7    | 0     | 7     | 6     | 1      | 6      | 8633.8004                     | -1.5                                     |
| 7    | 1     | 6     | 6     | 1      | 5      | 9351.3502                     | -1.6                                     |
| 7    | 1     | 7     | 6     | 1      | 6      | 8642.0823                     | -0.6                                     |
| 7    | 1     | 7     | 6     | 0      | 6      | 8662.2205                     | 2.1                                      |
| 7    | 2     | 5     | 6     | 2      | 4      | 9907.8985                     | 1.3                                      |
| 7    | 2     | 6     | 6     | 2      | 5      | 9186.3882                     | 0.2                                      |
| 8    | 0     | 8     | 7     | 0      | 7      | 9841.507                      | 1.3                                      |
| 8    | 0     | 8     | 7     | 1      | 7      | 9833.2238                     | -0.9                                     |
| 8    | 1     | 7     | 7     | 1      | 6      | 10513.3137                    | -1.6                                     |
| 8    | 1     | 8     | 7     | 1      | 7      | 9836.5146                     | 0.2                                      |
| 8    | 1     | 8     | 7     | 0      | 7      | 9844.7947                     | -0.8                                     |
| 8    | 2     | 6     | 7     | 2      | 5      | 11207.0374                    | 2.0                                      |
| 8    | 2     | 7     | 7     | 2      | 6      | 10414.2347                    | -1.3                                     |

Table S19. Measured transition lines for 1,7DSU $\cdots$ (H<sub>2</sub>O)<sub>2</sub>: Residual between observed frequency and that calculated (SPFIT) from the spectroscopic parameters (MHz), with the experimental accuracy of 0.005 MHz for all lines.

| $J'$ | $Ka'$ | $Kc'$ | $J''$ | $Ka''$ | $Kc''$ | $\nu_{\text{obs}}/\text{MHz}$ | $\Delta\nu_{\text{obs-calc}}/\text{kHz}$ |
|------|-------|-------|-------|--------|--------|-------------------------------|------------------------------------------|
| 5    | 4     | 1     | 4     | 3      | 2      | 8185.2031                     | 0.6                                      |
| 5    | 4     | 2     | 4     | 3      | 1      | 8164.5692                     | -1.3                                     |
| 5    | 4     | 2     | 4     | 3      | 2      | 8182.7697                     | -2.6                                     |
| 5    | 5     | 0     | 4     | 4      | 0      | 9000.4212                     | -1.1                                     |
| 5    | 5     | 1     | 4     | 4      | 1      | 9000.6685                     | -2.5                                     |
| 6    | 3     | 3     | 5     | 2      | 3      | 8228.2771                     | -4.5                                     |
| 6    | 3     | 4     | 5     | 2      | 4      | 8607.8315                     | 1.0                                      |
| 6    | 4     | 2     | 5     | 3      | 2      | 9196.5059                     | -0.1                                     |
| 6    | 4     | 3     | 5     | 3      | 3      | 9254.1551                     | -1.6                                     |
| 6    | 5     | 1     | 5     | 4      | 1      | 10057.2296                    | 1.1                                      |
| 6    | 5     | 2     | 5     | 4      | 1      | 10056.9534                    | 2.3                                      |
| 6    | 5     | 2     | 5     | 4      | 2      | 10059.383                     | 1.7                                      |
| 6    | 6     | 0     | 5     | 5      | 1      | 10881.7118                    | 2.9                                      |
| 6    | 6     | 0     | 5     | 5      | 0      | 10881.6782                    | -5.2                                     |
| 6    | 6     | 1     | 5     | 5      | 0      | 10881.6782                    | -2.9                                     |
| 6    | 6     | 1     | 5     | 5      | 1      | 10881.7118                    | 5.1                                      |
| 7    | 2     | 5     | 6     | 1      | 5      | 9044.3329                     | 1.6                                      |
| 7    | 3     | 4     | 6     | 2      | 4      | 9254.0354                     | 0.3                                      |
| 7    | 3     | 5     | 6     | 2      | 5      | 9809.7649                     | -1.6                                     |
| 7    | 4     | 3     | 6     | 3      | 4      | 10383.6995                    | -0.3                                     |
| 7    | 4     | 4     | 6     | 3      | 4      | 10342.2184                    | -0.3                                     |
| 7    | 5     | 2     | 6     | 4      | 3      | 11119.7031                    | 3.9                                      |
| 7    | 5     | 2     | 6     | 4      | 2      | 11107.8754                    | 3.3                                      |
| 7    | 5     | 3     | 6     | 4      | 2      | 11106.245                     | 4.5                                      |
| 7    | 5     | 3     | 6     | 4      | 3      | 11118.0707                    | 3.1                                      |
| 7    | 6     | 1     | 6     | 5      | 1      | 11940.0726                    | 7.6                                      |
| 7    | 6     | 2     | 6     | 5      | 2      | 11940.3185                    | 4.8                                      |
| 7    | 7     | 0     | 6     | 6      | 0      | 12761.9168                    | -9.6                                     |
| 7    | 7     | 1     | 6     | 6      | 1      | 12761.9168                    | -11.7                                    |
| 8    | 0     | 8     | 7     | 0      | 7      | 7765.3253                     | 2.2                                      |
| 8    | 1     | 7     | 7     | 1      | 6      | 8275.3741                     | -0.7                                     |
| 8    | 1     | 8     | 7     | 1      | 7      | 7759.2958                     | 1.3                                      |
| 8    | 2     | 6     | 7     | 2      | 5      | 8745.5747                     | -1.6                                     |
| 8    | 2     | 6     | 7     | 1      | 6      | 10439.7231                    | 2.0                                      |
| 8    | 2     | 7     | 7     | 2      | 6      | 8176.2848                     | 0.0                                      |
| 8    | 2     | 7     | 7     | 1      | 6      | 8393.1868                     | -2.9                                     |
| 8    | 2     | 7     | 7     | 1      | 7      | 11035.149                     | -2.4                                     |
| 8    | 3     | 5     | 7     | 3      | 4      | 8804.2484                     | 1.8                                      |
| 8    | 3     | 5     | 7     | 2      | 5      | 10354.5067                    | -3.5                                     |
| 8    | 3     | 6     | 7     | 3      | 5      | 8450.624                      | -0.1                                     |
| 8    | 3     | 6     | 7     | 2      | 6      | 11057.7286                    | -5.5                                     |

---

|    |   |    |    |   |    |            |      |
|----|---|----|----|---|----|------------|------|
| 8  | 4 | 4  | 7  | 4 | 3  | 8605.2868  | 1.5  |
| 8  | 4 | 4  | 7  | 3 | 4  | 11152.5544 | -0.8 |
| 8  | 4 | 5  | 7  | 4 | 4  | 8530.7865  | 1.3  |
| 8  | 4 | 5  | 7  | 3 | 5  | 11456.9656 | -1.8 |
| 8  | 5 | 3  | 7  | 5 | 2  | 8520.6826  | 4.9  |
| 9  | 0 | 9  | 8  | 0 | 8  | 8704.9788  | 1.8  |
| 9  | 0 | 9  | 8  | 1 | 8  | 8700.393   | 0.5  |
| 9  | 1 | 8  | 8  | 1 | 7  | 9195.9386  | -1.0 |
| 9  | 1 | 9  | 8  | 1 | 8  | 8702.3237  | 0.9  |
| 9  | 1 | 9  | 8  | 0 | 8  | 8706.9068  | -0.5 |
| 9  | 2 | 7  | 8  | 2 | 6  | 9737.2338  | -1.2 |
| 9  | 2 | 8  | 8  | 2 | 7  | 9137.8113  | 0.9  |
| 9  | 3 | 6  | 8  | 3 | 5  | 9941.8367  | 2.4  |
| 9  | 3 | 6  | 8  | 2 | 6  | 11550.7669 | -1.3 |
| 9  | 3 | 7  | 8  | 3 | 6  | 9467.5681  | -0.3 |
| 9  | 4 | 5  | 8  | 4 | 4  | 9756.3412  | 0.6  |
| 9  | 4 | 6  | 8  | 4 | 5  | 9601.4785  | -1.7 |
| 9  | 5 | 4  | 8  | 5 | 3  | 9614.9691  | 1.9  |
| 9  | 5 | 5  | 8  | 5 | 4  | 9598.8219  | -1.3 |
| 10 | 0 | 10 | 9  | 0 | 9  | 9645.6009  | 0.4  |
| 10 | 0 | 10 | 9  | 1 | 9  | 9643.6686  | -1.6 |
| 10 | 1 | 9  | 9  | 1 | 8  | 10121.5921 | -1.2 |
| 10 | 1 | 9  | 9  | 2 | 8  | 10061.9112 | 3.6  |
| 10 | 1 | 10 | 9  | 1 | 9  | 9644.4662  | -1.0 |
| 10 | 1 | 10 | 9  | 0 | 9  | 9646.398   | 0.5  |
| 10 | 2 | 8  | 9  | 2 | 7  | 10682.0149 | -1.8 |
| 10 | 2 | 9  | 9  | 2 | 8  | 10090.6484 | -0.4 |
| 10 | 3 | 7  | 9  | 3 | 6  | 11040.07   | 2.1  |
| 10 | 3 | 8  | 9  | 3 | 7  | 10466.105  | -0.7 |
| 10 | 4 | 6  | 9  | 4 | 5  | 10932.1986 | -0.5 |
| 10 | 4 | 7  | 9  | 4 | 6  | 10661.3115 | -2.8 |
| 10 | 5 | 5  | 9  | 5 | 4  | 10726.6439 | -7.0 |
| 10 | 5 | 6  | 9  | 5 | 5  | 10684.7759 | -0.3 |
| 11 | 0 | 11 | 10 | 0 | 10 | 10586.6518 | -0.7 |
| 11 | 1 | 10 | 10 | 1 | 9  | 11053.3342 | -0.8 |
| 11 | 1 | 11 | 10 | 1 | 10 | 10586.1805 | 0.9  |
| 11 | 2 | 9  | 10 | 2 | 8  | 11597.9861 | -0.9 |
| 11 | 2 | 9  | 10 | 3 | 8  | 11248.6542 | 7.5  |
| 11 | 2 | 10 | 10 | 2 | 9  | 11037.9232 | -1.5 |
| 11 | 3 | 9  | 10 | 3 | 8  | 11447.4683 | -1.1 |
| 12 | 0 | 12 | 11 | 0 | 11 | 11527.8609 | -3.0 |
| 12 | 1 | 11 | 11 | 1 | 10 | 11989.3055 | 2.5  |
| 12 | 1 | 12 | 11 | 1 | 11 | 11527.6681 | -1.9 |
| 12 | 2 | 10 | 11 | 2 | 9  | 12507.374  | 0.1  |

---

---

|    |   |    |    |   |    |            |      |
|----|---|----|----|---|----|------------|------|
| 12 | 2 | 11 | 11 | 2 | 10 | 11981.9809 | 0.4  |
| 13 | 0 | 13 | 12 | 0 | 12 | 12469.105  | -1.3 |
| 13 | 1 | 12 | 12 | 1 | 11 | 12927.6834 | -0.1 |
| 13 | 1 | 13 | 12 | 1 | 12 | 12469.0308 | 2.9  |
| 13 | 2 | 12 | 12 | 2 | 11 | 12924.3239 | 1.4  |

---
